# Supplementary material
Source: PubMed Central journal article supplement (PMC4563739)

Supplementary table 1: PCR primers used in the study

|                                                 | <b>Forward</b>           | <b>Reverse</b>              |
|-------------------------------------------------|--------------------------|-----------------------------|
| <b>4E-BP1</b>                                   | CTAGCCCTACCAGCGATGAG     | CCTGGTATGAGGCCTGAATG        |
| <b>Atg7</b>                                     | GACCGGTCTTACCCTGCTC      | TGTGGTTGCTTGCTTCAGAC        |
| <b>Atg12</b>                                    | CCATCCAAGGACTCATTGAC     | TTGCAGTAATGCAGGACCAG        |
| <b>Atp5b</b>                                    | GAGGTCTTCACGGGTCACAT     | CCCACCATGTAGAAGGCTTG        |
| <b>Atp5j</b>                                    | GGCCAGAGTATCAGCAAGA      | CTGGGGTTTGTGCGATGACTT       |
| <b>Atp5l</b>                                    | CCTGCTGAAATCCCTACAGC     | CACCAAACCATTTCAGCACAG       |
| <b>Atp5o</b>                                    | GCTTCCTGAGTCCAAACCAA     | GCCTTGCTGAGCTTCTGAAT        |
| <b>Atrogin 1</b>                                | CAGCTGGATTGGAAGAAGATG    | TCAGAACTTGAACAAATTGA        |
| <b>Btg1</b>                                     | CGGTGTCCTTCATCTCCAAG     | GGTAACCTGATCCCTTGAC         |
| <b>Catalase</b>                                 | GGACGCTCAGCTTTTCATTC     | CAGGTTAGCTTTTCCCTTCG        |
| <b>Cathepsin L</b>                              | GTTGGTGGGCTATGGCTATG     | CCGGTCTTTGGCTATTTTGA        |
| <b>Coq2</b>                                     | CTGTCCCCTACTACGCTGCT     | CGGTTGGAGGTGAACTTGTC        |
| <b>Cox4il</b>                                   | GGCACCATGAATGGAAGAC      | CCTTCATGTCCAGCATTCCG        |
| <b>Cox5b</b>                                    | GATGAGGAGCAGGCTACTGG     | CAGCCAAAACCAGATGACAG        |
| <b>Cox6a2</b>                                   | GACCTTTGTGCTGGCTCTTC     | ATTGTGGAAAAGCGTGTGGT        |
| <b>Cyclin G2</b>                                | TTCTGAGCTGCCACTATC       | GGTGGAAAGCACAGTGTCTG        |
| <b>Ddb1</b>                                     | CCCTAAGATGCAGGAGGTTG     | CGAGTTAGCTCCTCCACGAC        |
| <b>Fgf21</b>                                    | CAGGGGTCATTCAAATCCTG     | GGAGTCCTTCTGAGGCAGAC        |
| <b>Fndc5</b>                                    | GGTGCTGATCATTGTTGTGG     | CGCTCTGGTTTTCTCCTTG         |
| <b>FoxO1</b>                                    | GAGAGCTCAGCCGAGAAGAG     | CTCCCTCTGGATTGAGCATC        |
| <b>G6Pase</b>                                   | CTGTCTGTCCCGGATCTACC     | GTAGAATCCAAGCGCGAAAC        |
| <b>Gadd45</b>                                   | GCGAGAACGACATCAACATC     | TCCCGGCAAAAACAAATAAG        |
| <b>HPRT</b>                                     | CCGAGGATTTGGAAAAGTG      | CCAGCAGGTCAGCAAAGAAC        |
| <b>MHC1 (Myh7)</b>                              | GCCAACTATGCTGGAGCTGATGCC | GGTGCGTGGAGCGCAAGTTTGTATAAG |
| <b>MHCIIX</b>                                   | GAAGAGTGATTGATCCAAGTG    | TATCTCCAAAGTTATGAGTACA      |
| <b>Myh4</b>                                     | GCAGGACTTGGTGGACAAAC     | CAGCTTGTGACCTGGGACT         |
| <b>MuRF1</b>                                    | GCAAGGCTTTGAGAACATGG     | TCTTCTCATCAGCCTCCTC         |
| <b>Ndufb2</b>                                   | CAGGTGATCCAGGGTGAGTT     | CTCGTCATCAGGAGGGATTG        |
| <b>Ndufb5</b>                                   | GCTTGCAGAAATCCAGAAG      | GGATAGCCAGGGTTTTCTCG        |
| <b>Ndufs1</b>                                   | GTTCTTGCTGACCCACTCGT     | GCATATGGACGGCTCCTCTA        |
| <b>p21</b>                                      | CTTGTCGCTGTCTTGCACTC     | CTCCTGACCCACAGCAGAAG        |
| <b>p27</b>                                      | GTGGACCAATGCCTGACTC      | CTGTTGGCCTTTTGTTTTG         |
| <b>p62</b>                                      | GAAGCTGCCCTATACCCACA     | GAGAAACCCATGGACAGCAT        |
| <b>Pck1</b>                                     | GAAGTTCGTGGAAGGCAATG     | CATCTCGAGGGTCAGTGAGAG       |
| <b>Pgc1α</b>                                    | TTACACCTGTGACGCTTTCG     | AGCAGGGTCAAAATCGTCTG        |
| <b>PPIA</b>                                     | GACCAAACACAAACGGTTCC     | CATGCCTTCTTTCACCTTCC        |
| <b>SdhA</b>                                     | CAGTTTCGAGGCTTCTTCG      | CTCAGAAAGGCCAAATGCAG        |
| <b>SdhB</b>                                     | GACGTCAGGAGCCAAAATG      | CACCTCGTACGTCTGCATTC        |
| <b>Sirt4</b>                                    | GAAAGAGGCGGACTCCCTAC     | CGGGTCTATTAAAGGCAGCA        |
| <b>Sod2</b>                                     | CCGAGGAGAAGTACCACGAG     | GCTTGATAGCCTCCAGCAAC        |
| <b>Tnni1 (troponin I type 1-skeletal, slow)</b> | CTGGGCTCTAAGCACAAGGT     | ATGCCAGACATAGCCTCCAC        |

|                                                  |                       |                      |
|--------------------------------------------------|-----------------------|----------------------|
| <b>Tnni2 (troponin I type 2- skeletal, fast)</b> | CCTGAAGCAGGTCAAGAAGG  | TCCATGCCAGACTTCTCCTC |
| <b>UCP1</b>                                      | GCCTGGCAGATATCATCACC  | CAGACCGCTGTACAGTTTCG |
| <b>UCP2</b>                                      | GCCACTTCACTTCTGCCTTC  | CTACGTTCCAGGATCCCAAG |
| <b>UCP3</b>                                      | GCTGAAGATGGTGGCTCAG   | TTAAGGCCCTTTCAGTTGC  |
| <b>Uqcrc1</b>                                    | GAAGACATTGGTCGCAGTCTC | CGGTTGTAGTCTGGGAGCTG |

## Supplementary Figure Legends:

### Supplemental Figure S1

Generation skeletal muscle or adipose tissue-specific *4E-BP1* transgenic mice. **(A)** Structure of *4EBP1mt* transgenic alleles. The expression of each transgene is blocked by the presence of a *loxP*-flanked translational STOP codon cassette. CRE-mediated recombination excises the STOP element, which is fused with GFP, and permits the expression of transgenes under the control of the chicken  $\beta$ -actin promoter, indicated by the blue line. **(B)** Expression of total 4E-BP1 protein in quadriceps muscle and **(C)** in visceral fat and liver from 6 month-old control and *Tg-4EBP1mt-muscle* male mice fed a normal chow. **(D)** Western blots on visceral fat of *Tg-4EBP1mt-fat* mice and control littermates to quantify total 4E-BP1 expression. **(E)** RT-PCR quantification of endogenous *4E-BP1* mRNA expression in quadriceps muscle from 6 month-old control and *Tg-4EBP1mt-muscle* male mice. P values were calculated by one-tailed unpaired student's t-test. RT-PCR samples were from n=4/genotype.

### Supplemental Figure S2

Transgenic 4E-BP1mt protein is functional to sequester eIF4E from eIF4G. **(A)** Lysate from skeletal muscle was subjected to co-immunoprecipitate using anti-eIF4E antibody or Rabbit IgG. Western blot analysis of 4E-BP1 to detect the interaction of eIF4E and 4E-BP1. **(B)** Western blot of cap binding assay to analyze eIF4E-eIF4G complex formation in skeletal muscle. The translation initiation complex was pull down by the cap analog m<sup>7</sup>GTP-sepharose and western blotted with antibodies against eIF4G, eIF4E, or 4E-BP1. **(C)** Quantification of cap binding assays on eIF4G level, which associated with translation initiation complex normalized to control. **(D)** Quantification of cap binding assays on eIF4G level normalized to input eIF4G level and to control. **(E)** Coomassie blue staining for total protein loading quantification and **(F)** western blot analysis of puromycin incorporation in total protein in quadriceps muscle from 6 month-old male mice injected with puromycin. **(G)** Quantification of signal from (F). P values were calculated by one-tailed unpaired student's t-test. Number of mice analyzed indicated in bar.

### Supplemental Figure S3

The expression of *FoxO1* is increased in 4E-BP1 activated skeletal muscle. **(A)** Western blots and **(B)** RT-PCR quantification of *FoxO1* expression in 4E-BP1 activated mouse quadriceps

muscle from 6 month-old male mice fed a normal chow (n=4/ genotype). P values were calculated by one-tailed unpaired student's t-test. RT-PCR samples were from n=4/genotype.

#### Supplemental Figure S4

Initial characterization of *4E-BPI* double transgenic mice. **(A)** Body weight measurement in female mice of muscle- and adipose-specific induced *4E-BPI* transgene fed a normal chow. (n= 8-16/ genotype). **(B)** Food consumption per day and **(C)** food consumption measured in **(B)** normalized in body weight in 6 month-old male mice fed a normal chow. **(D)** IGF-1 plasma values in 6 month-old mice. Number of mice analyzed indicated in bar. P values were calculated by one-tailed unpaired Student's *t*-test.

#### Supplemental Figure S5

Assessment of glucose homeostasis in *4E-BPI* transgenic mice. **(A)** Fasting glucose level in 2 month-old mice. *P* vales were assessed by a two-way ANOVA. Bonferroni post-tests to compare replicate means by row. Number of mice analyzed indicated in bar. **(B)** Glucose tolerance assay in 6 month-old male and **(C)** female mice fed a normal chow. **(D)** Insulin challenge assay in 6 month-old mice male and **(E)** female mice fed a normal chow. (n=8-16/ genotype) *P* values were calculated by one-tailed unpaired Student's *t*-test.

#### Supplemental Figure S6

Measurement of fat mass and organ weight in 6 month-old *4E-BPI* transgenic mice fed a normal chow. **(A)** Body weight measurement, and **(B)** fat mass measurement quantified by qMR. Number of mice analyzed indicated in bar. **(C)** Organ weight normalized by total body weight in male and **(D)** female mice, (n=4/ genotype). *P* vales were assessed by a two-way ANOVA. Bonferroni post-tests to compare replicate means by row.

#### Supplemental Figure S7

Analysis of adipose cell size in *Tg-4EBP1mt-muscle* mice. **(A)** Quantification of adipose size in visceral fat and **(B)** inguinal fat from 6 month-old male mice fed a normal chow. (n=3-4 /genotype).

#### Supplemental Figure S8

Characterization of adipose tissue in *Tg-4EBP1mt-muscle* mice. **(A)** RT-PCR quantification of *Pgc-1 $\alpha$*  and **(B)** *Ucp1* in 6 month-old male mouse adipose tissues (n=4/ genotype). *P* vales were assessed by a two-way ANOVA. Bonferroni post-tests to compare replicate means by row. RT-PCR samples were from n=4/genotype. **(C)** Representative Western blots analysis of CPT1 $\alpha$  and UCP1 expression in brown adipose tissue from 6 month-old male mice fed a normal chow.

#### Supplemental Figure S9

Measurement of lean mass in 6 month-old control and *Tg-4EBP1mt-muscle* mice. **(A)** Lean mass measurement in male and **(B)** female mice quantified by qMR (each dot represents an individual mouse).

#### Supplemental Figure S10

Activation of 4E-BP1 in skeletal muscles leads to muscular atrophy. **(A)** Representative images of Hematoxylin & Eosin staining to show morphology, Trichrome staining to detect fibrosis, Periodic acid-Schiff staining to detect glycogen deposit, and Oil-Red staining to detect lipid accumulation in male mouse quadriceps muscle sections from 6 month-old male mice fed a normal chow. Scale bar = 100 $\mu$ m. **(B)** Quantification of muscle fiber size in 6 month-old male and **(C)** female mouse quadriceps muscle. **(D)** Analysis of the mean fiber cross-section-area in quadriceps muscles from **(A)** and **(B)**. **(E)** Quantification of percentage of central nuclei in 6 month-old mouse quadriceps muscles. (Normal chow fed mice were used in the assessments.) *P* vales were assessed by a two-way ANOVA. Bonferroni post-tests to compare replicate means by row. Number of mice analyzed indicated in bar.

#### Supplemental Figure S11

Autophagy is induced in *Tg-4EBP1mt-muscle* mouse muscle. **(A)** Real-Time PCR quantification of atrophic and autophagy-related genes in male quadriceps muscle from 6 month-old mice fed a normal chow (n=4/ genotype). *P* vales were assessed by a two-way ANOVA. Bonferroni post-tests to compare replicate means by row. RT-PCR samples were from n=4/genotype. **(B)** Western blots on quadriceps muscles from 12 month-old male mice fed a normal chow to detect increased autophagy-induced LC3 II isoform. **(C)** Quantification of ration of LC3-II and LC3-I signaling from **(B)**. *P* values were calculated by one-tailed unpaired Student's *t*-test. \**P*<0.05; \*\**P*<0.01

### Supplemental Figure S12

Activity assessment in *Tg-4EBP1mt-muscle* mice. **(A)** Running capacity measured by treadmill in male and **(B)** female mice. **(C)** Volunteer activities assay, which is monitored in metabolic cage by assessment of the travel distance that a single-housed mouse moved around the cage in 6 month-old male and **(D)** female mice. (Normal chow fed mice were used in the assessments. n=5-8 /genotype). *P* vales were assessed by a two-way ANOVA. Bonferroni post-tests to compare replicate means by row.

### Supplemental Figure S13

PI3Kinase signaling is altered in 4E-BP1 activated skeletal muscle. **(A)** Western blots of AKT1 expression. **(B)** RT-PCR quantification of FOXO1 target genes. n=4/ genotype. *P* vales were assessed by a two-way ANOVA. Bonferroni post-tests to compare replicate means by row.

\*\**P*<0.005; \*\*\**P*<0.001

### Supplemental Figure S14

Measurement of total body fat mass in 6 month-old control and *Tg-4EBP1mt-muscle* mice. **(A)** Fat mass measurement in male and **(B)** female mice quantified by qMR (each dot represents an individual mouse). **(C)** Serum leptin measurement in 2-month-old mice fed a normal chow (number of mice analyzed indicated in bar). *P* vales were assessed by a two-way ANOVA. Bonferroni post-tests to compare replicate means by row.

### Supplemental Figure S15

Assessment of fat metabolism in in control and *Tg-4EBP1mt-muscle* mice. **(A)** Cholesterol, **(B)** free fatty acid, and **(C)** triglyceride plasma values in 6-month-old mice. *P* vales were assessed by a two-way ANOVA. Bonferroni post-tests to compare replicate means by row. Number of mice analyzed indicated in bar.

### Supplemental Figure S16

Activated 4E-BP1 in skeletal muscles leads to muscle fiber type transformation. **(A)** Representative images of immunofluorescence stained tibias anterior and quadriceps muscle sections from 6 month-old male mice fed a normal chow to detect each muscle type. Type I muscle (MHCI-blue) and type II muscle (MHC2a-green, MHC2b-red and MHC2x-unstained). Scale bar = 100µm. **(B)** RT-PCR quantification of slow (*Tnni1*) and fast (*Tnni2*) genes, **(C)** of

myosin heavy chain 1 (*Mhc1*) for detecting type I muscle and myosin heavy chain 4 (*Myh4*) for detecting type IIb muscle, and **(D)** of myosin heavy chain IIx (*MyhcIIx*) for detecting type IIx muscle in quadriceps muscle from 6-month-old male mice fed a normal chow. **(E)** RT-PCR quantification of mtDNA (*CoxII*) and nuclear genomic DNA (*β-actin*) in indicated tissues from 6-month-old male mice fed a normal chow. *P* values were assessed by a two-way ANOVA. Bonferroni post-tests to compare replicate means by row. (n=4/ genotype)

#### Supplemental Figure S17

Increased uncoupler protein expression in *Tg-4EBP1mt-muscle* mouse skeletal muscle. **(A)** Real-Time PCR quantification of PGC-1 $\alpha$  target genes in quadriceps muscle from 6-month-old male mice fed a normal chow. (n=4/ genotype) *P* values were assessed by a two-way ANOVA. Bonferroni post-tests to compare replicate means by row. \**P*<0.05; \*\*\**P*<0.001. **(B)** Western blots of UCP3 in quadriceps muscles.

#### Supplemental Figure S18

Increased metabolic rate and mitochondria activity in *Tg-4EBP1mt-muscle* mice. **(A)** Oxygen consumption measurement in 6 month-old female mice fed a normal chow (n=8/ genotype). **(B)** Respiratory quotient (RQ) quantified by oxygen consumption and CO<sub>2</sub> generation in 6 month-old mice fed a normal chow (n=5-10/ genotype). **(C)** Oxygen consumption rates (OCR) measured in isolated skeletal muscle mitochondria in the presence of Pyruvate/Malate and **(D)** Palmitoyl Carnitine /Malate (n=5/ genotype). *P* values were assessed by a two-way ANOVA. Bonferroni post-tests to compare replicate means by row.

#### Supplemental Figure S19

HFD induces weight gain in *4E-BP1* transgenic mice comparable to control mice. **(A)** Body weight measurement in male and **(B)** female of *4E-BP1* transgenic line and control mice fed a HFD. (n= 8-16/genotype).

#### Supplemental Figure S20

Assessment of glucose homeostasis in mice fed a HFD. **(A)** Body weight and **(B)** Insulin plasma values at 6-month-old mice fed HFD. *P* values were assessed by a two-way ANOVA. Bonferroni post-tests to compare replicate means by row. Number of mice analyzed indicated in bar. **(C)** Glucose tolerance assay and **(D)** insulin challenge assay in 6 hr-fasted female mice fed a HFD at

6 months of age (n=8-24/ genotype). \*P<0.05; \*\*\*P<0.001; P values were calculated by one-tailed unpaired Student's *t*-test.

#### Supplemental Figure S21

Increased insulin sensitivity in *Tg-4EBP1mt-muscle* mice fed a HFD. Western blot of AKT1 phosphorylation at Ser 473 and total AKT1 detected in liver and visceral fat of male mice before(-) or after(+) insulin injection on a HFD feeding.

#### Supplemental Figure S22

Quantification of obesity in *4E-BP1* transgenic mice on HFD. (A) Total fat mass measurement quantified by qMR in mice on a HFD feeding. (B) Normalized the analysis of (A) with body weight. P values were assessed by a two-way ANOVA. Bonferroni post-tests to compare replicate means by row. Number of mice analyzed indicated in bar.

#### Supplemental Figure S23

Uncoupling protein 1 expression is increased in *Tg-4EBP1mt-muscle* mouse brown adipose tissue. Real-time PCR quantification of *Ucp1* expression in brown adipose tissues from 6 month-old male mice fed a normal chow or HFD (n=4/ genotype and diet). P values were assessed by a two-way ANOVA. Bonferroni post-tests to compare replicate means by row.

#### Supplemental Figure S24

Measurement of metabolic rates in *Tg-4EBP1mt-muscle* mice on a HFD. (A) Oxygen consumption measurement in 6-month-old mice fed a HFD in 3 day-night period of time (n=8/genotype). (B) RQ quantified by oxygen consumption and CO<sub>2</sub> generation in 6 month-old mice fed a HFD (n=4-6/ genotype). P values were assessed by a two-way ANOVA. Bonferroni post-tests to compare replicate means by row.

#### Supplemental Figure S25

Assessment of uncoupling protein expression in 4E-BP1 activated skeletal muscles. (A) Real-time RT-PCR quantification of *Ucp2* and (B) *Ucp3* expression in quadriceps muscle from 6 month-old male control and *Tg-4EBP1mt-muscle* mice fed a normal chow or HFD. P values were assessed by a two-way ANOVA. Bonferroni post-tests to compare replicate means by row. (n=4/genotype)



#### Supplemental Figure S26

Assessments of behavior in *Tg-4EBP1mt-muscle* mice on a HFD. **(A)** Food intake and **(B)** measurement of voluntary home-cage activity in 6-month-old mice fed a HFD in 3 day-night period of time (n=8/genotype). *P* values were assessed by a two-way ANOVA. Bonferroni post-tests to compare replicate means by row.

#### Supplemental Figure S27

Activation of 4E-BP1 in skeletal muscles slows aging-induced muscular atrophy. Quantification of muscle fiber size in 6 and 17 month-old mouse quadriceps muscle. (Normal chow fed mice were used in the assessments. n=3-5/ genotype)

#### Supplemental Figure S28

*Tg-4EBP1mt-muscle* mice is resistant to aging-induced obesity. **(A)** Body weight, **(B)** lean mass, **(C)** lean mass percentage measured in **(B)** normalized in body weight, **(D)** total fat mass, and **(E)** fat mass percentage measured in **(D)** normalized in body weight measurement quantified by qMR in normal chow fed male mice. *P* values were assessed by a two-way ANOVA. Bonferroni post-tests to compare replicate means by row. Number of mice analyzed indicated in bar.

#### Supplemental Figure S29

Measurement of respiratory quotient in *Tg-4EBP1mt-muscle* mice during aging. **(A)** and **(B)** RQ quantified by oxygen consumption and CO<sub>2</sub> generation in normal diet fed male mice (n=5-13/ genotype). *P* values were assessed by a two-way ANOVA. Bonferroni post-tests to compare replicate means by row.

#### Supplemental Figure S30

Increased FGF-21 expression from 4EBP1 activated skeletal muscle reduced lipogenesis in *Tg-4EBP1mt-muscle* mouse liver. **(A)** Western blot on quadriceps muscles from 6 month-old female mice fed a normal chow to detect FGF-21 expression. **(B)** Western blots on quadriceps muscles from 6 month-old male mice fed a normal chow to detect SREBP1 expression in liver. **(C)** RT-PCR quantification of genes involved in fatty acid metabolism in liver (n=4/ genotype). *P* values were assessed by a two-way ANOVA. Bonferroni post-tests to compare replicate means by row. \**P*<0.05; \*\**P*<0.01; \*\*\**P*<0.001.

### Supplemental Figure S31

Analysis of  $\beta$ -oxidation gene expression in *Tg-4EBP1<sup>mt-muscle</sup>* mice. **(A)** RT-PCR quantification of  $\beta$ -oxidation gene expression in 6 month-old normal diet fed male mouse skeletal muscle, and **(B)** visceral fat. **(C)** RT-PCR quantification of *Fgf-21* expression in 6 month-old HFD fed male mouse skeletal muscle. **(D)** RT-PCR quantification of  $\beta$ -oxidation gene expression in 6 month-old HFD fed male mouse skeletal muscle, **(E)** visceral fat, and **(F)** liver. *P* values were assessed by a two-way ANOVA. Bonferroni post-tests to compare replicate means by row. (n=4/ genotype)

### Supplemental Figure S32

Acute activated 4E-BP1 in skeletal muscles leads to increased *Fgf-21* and muscle type I gene expression. **(A)** RT-PCR quantification of slow (*Tnni1*) and fast (*Tnni2*) genes, **(B)** of myosin heavy chain 1 (*Mhc1*) for detecting type I muscle and myosin heavy chain 4 (*Myh4*) for detecting type IIb muscle, and **(C)** of myosin heavy chain IIx (*MyhcIIx*) for detecting type IIx muscle in quadriceps muscle. *P* values were assessed by a two-way ANOVA. Bonferroni post-tests to compare replicate means by row. **(D)** RT-PCR quantification of mtDNA (*CoxII*) and nuclear genomic DNA ( *$\beta$ -actin*). **(E)** RT-PCR quantification of *Fgf21* in quadriceps muscle. *P* values were calculated by two-tailed unpaired Student's *t*-test. Mice were injected with either Tamoxifen or Oil at 6 month of age for 5 days and harvested 2 days after the final injections. (n=3-5/group)

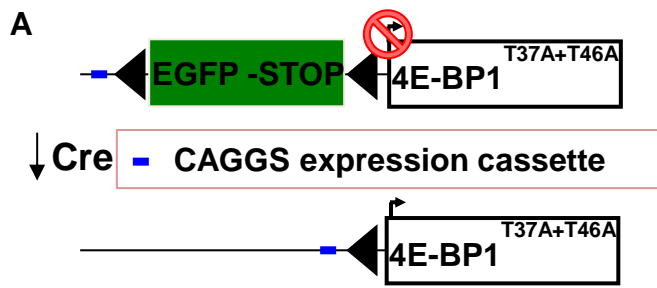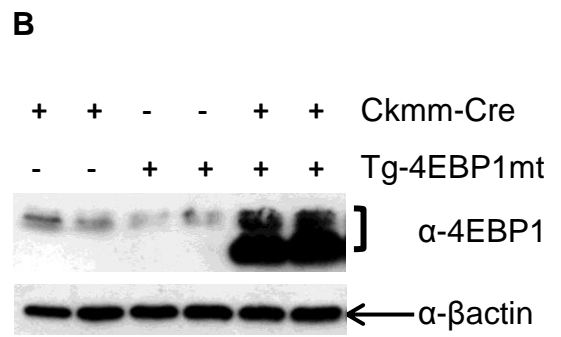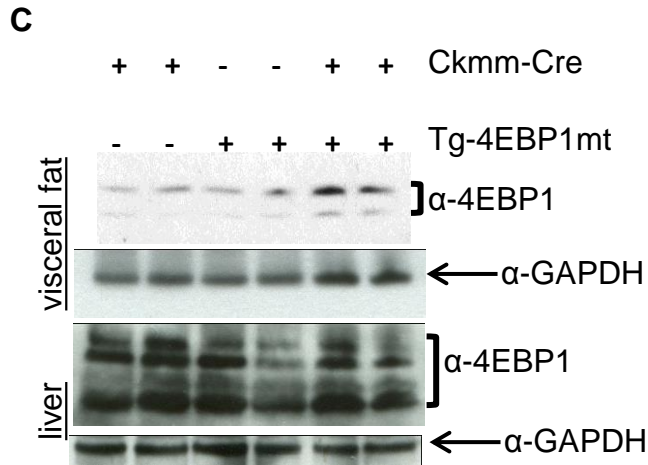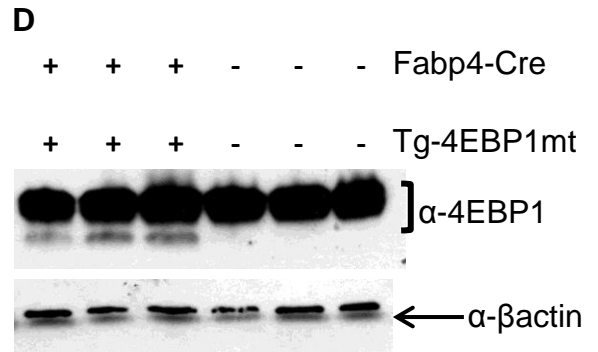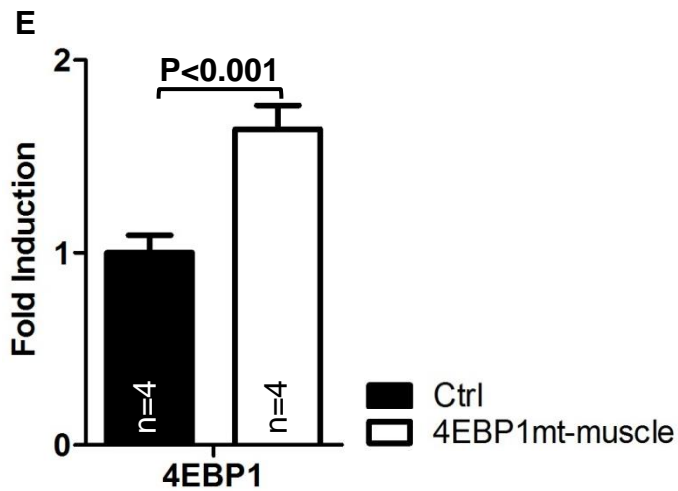

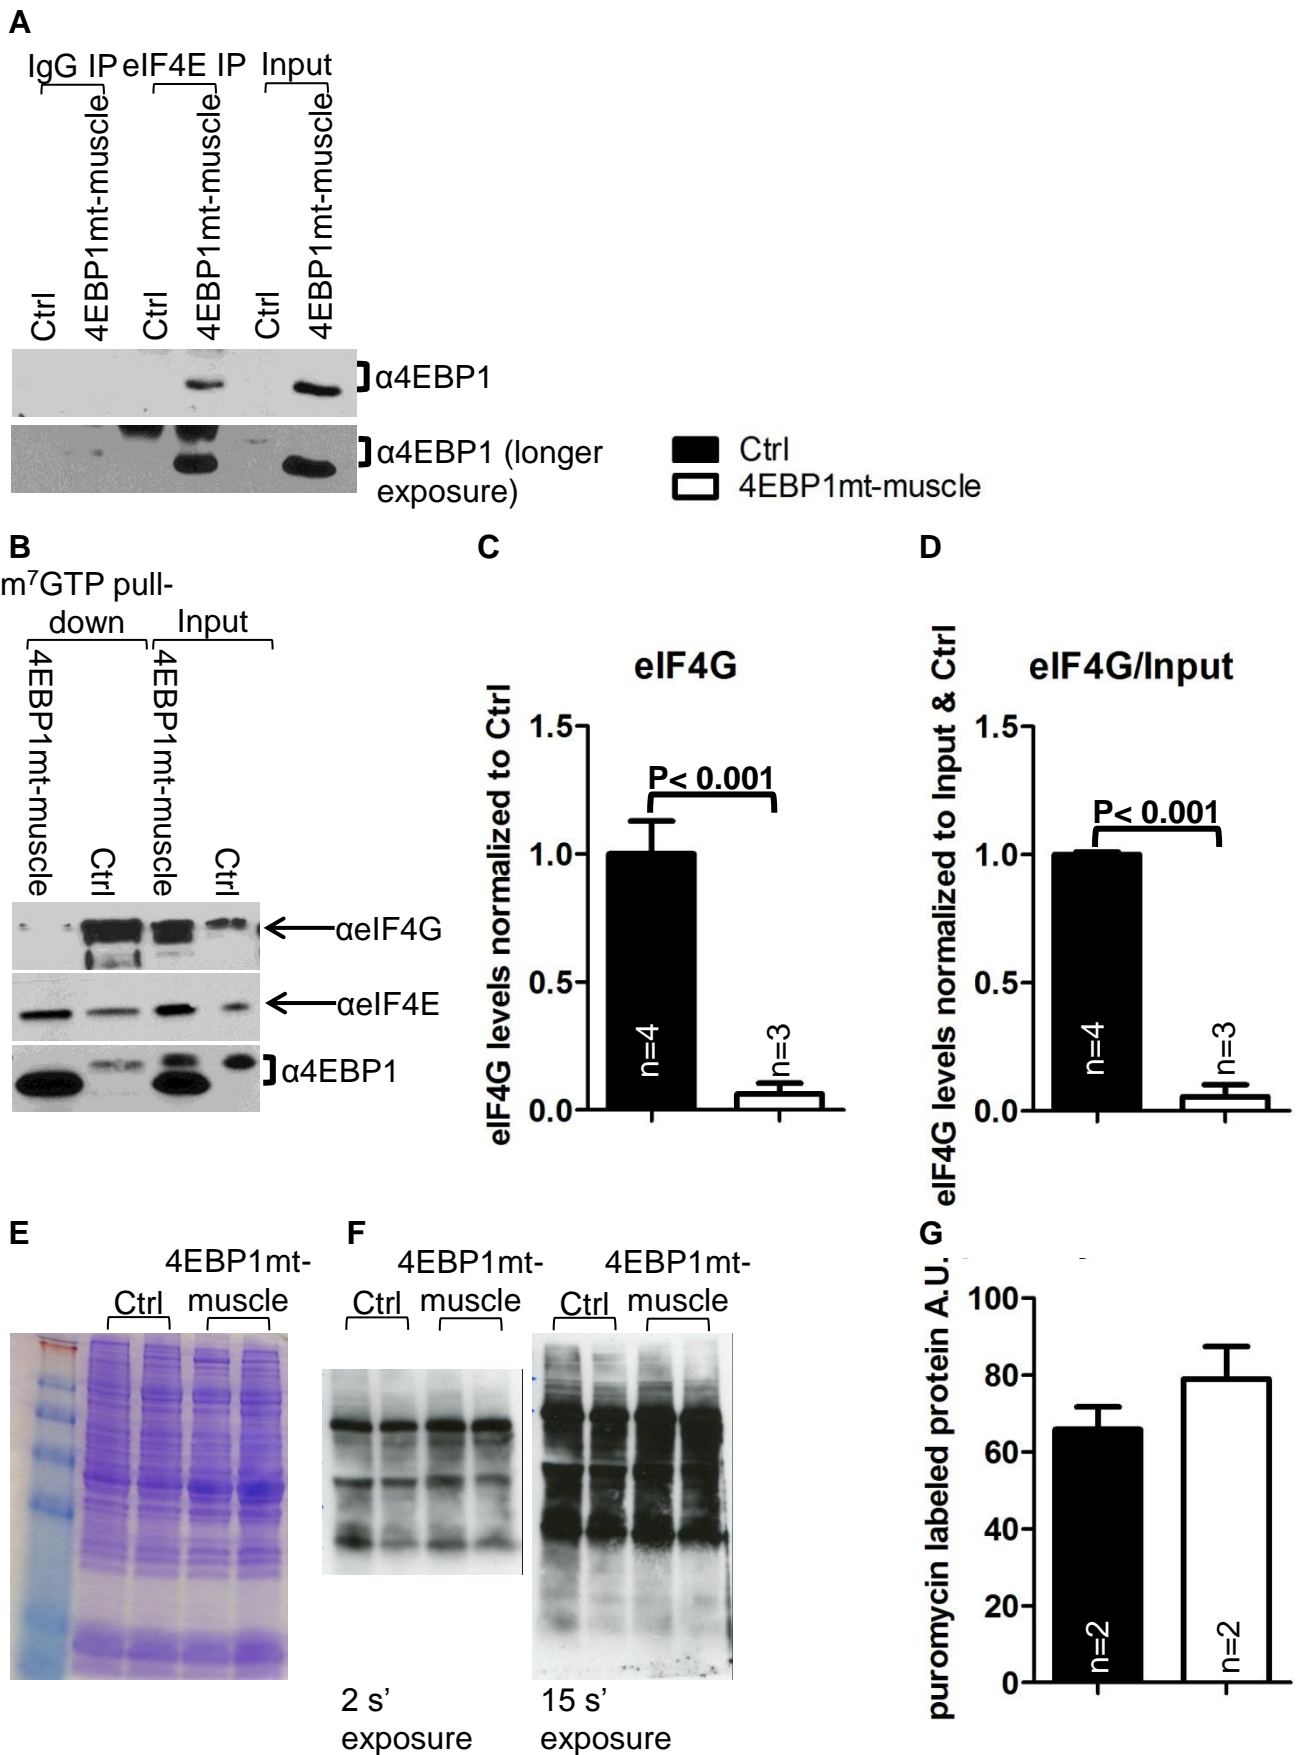

Supplementary Figure 2.

**A**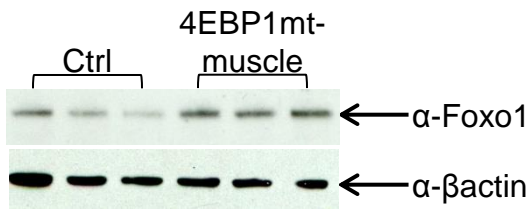**B**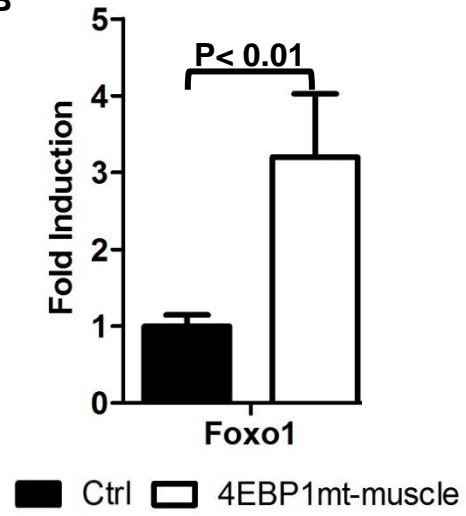

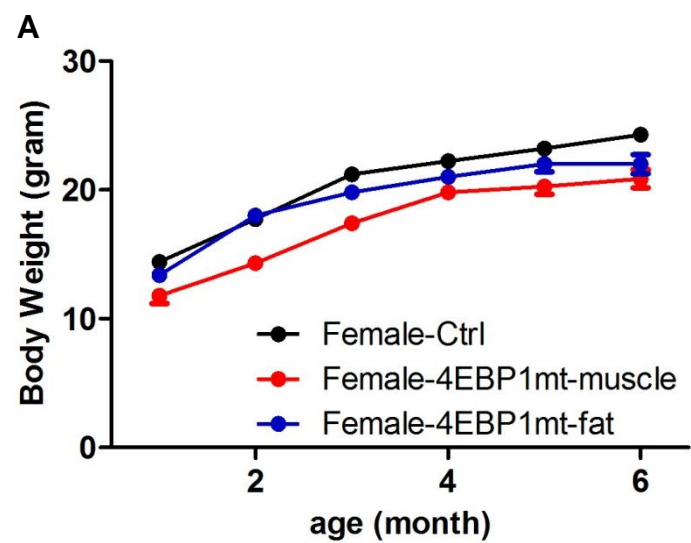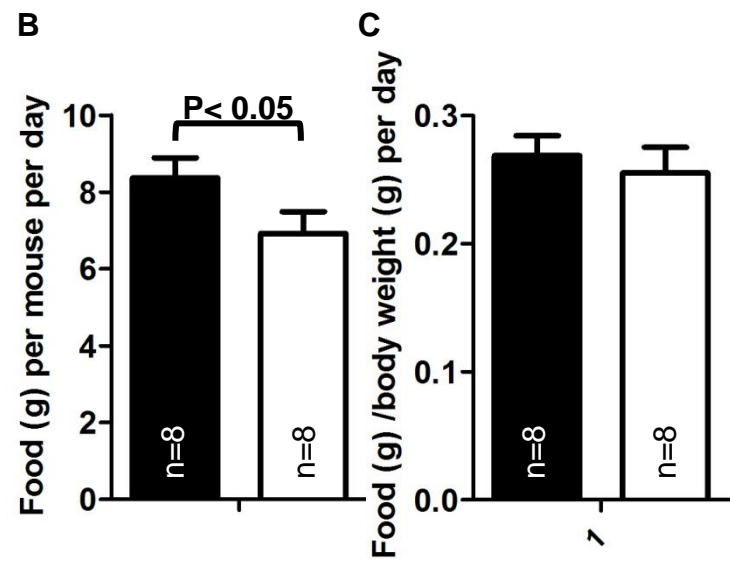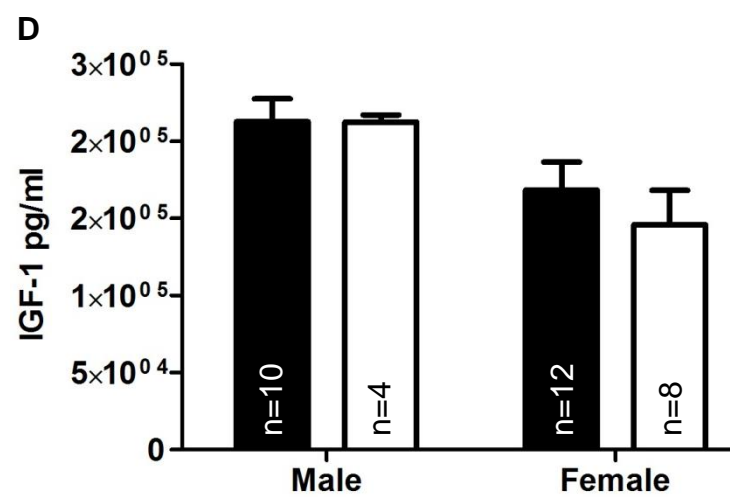

■ Ctrl □ 4EBP1mt-muscle

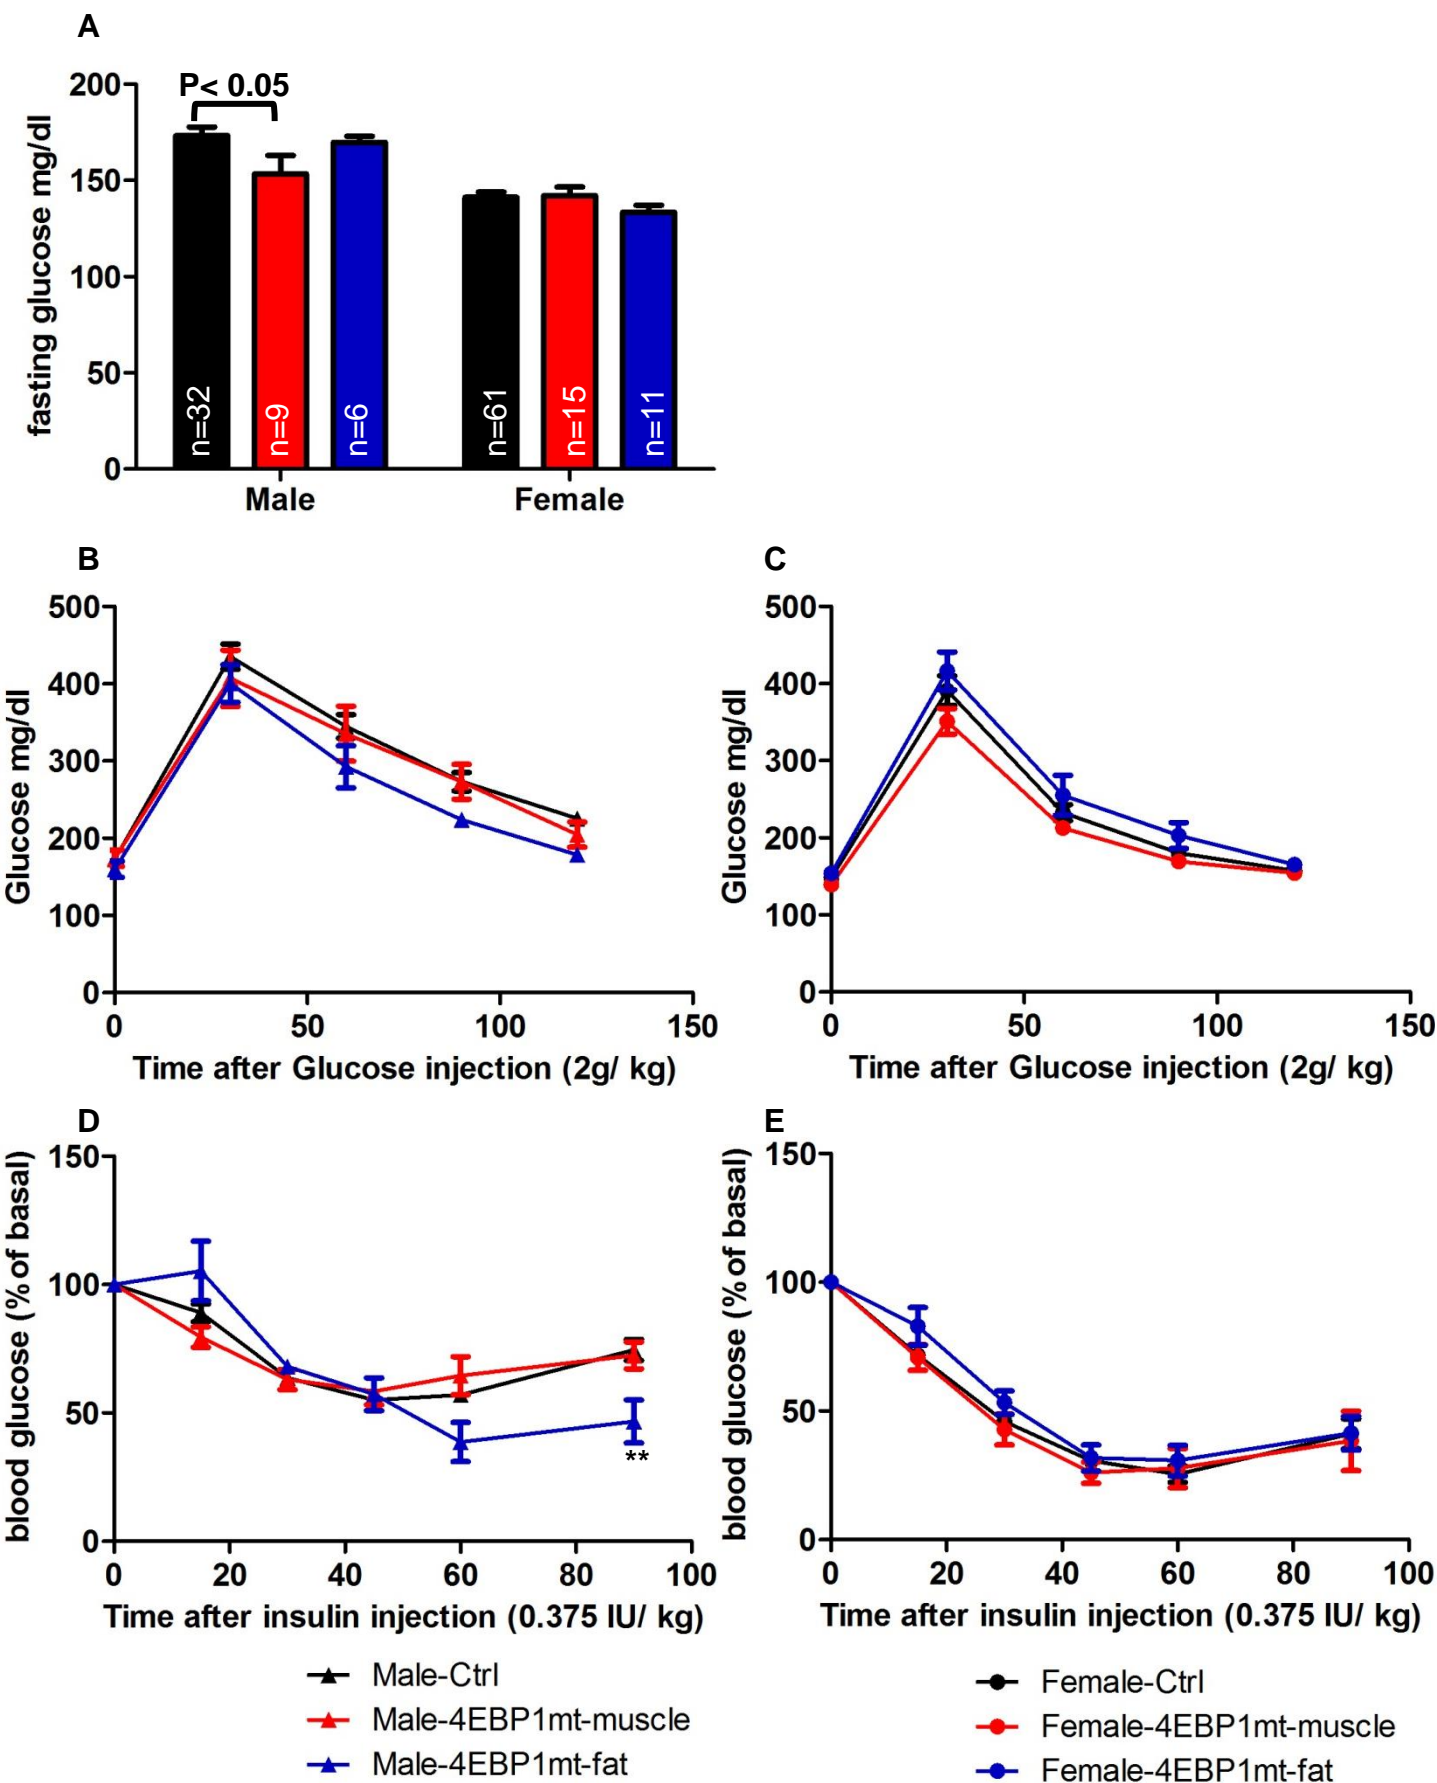

**Supplementary Figure 5.**

A

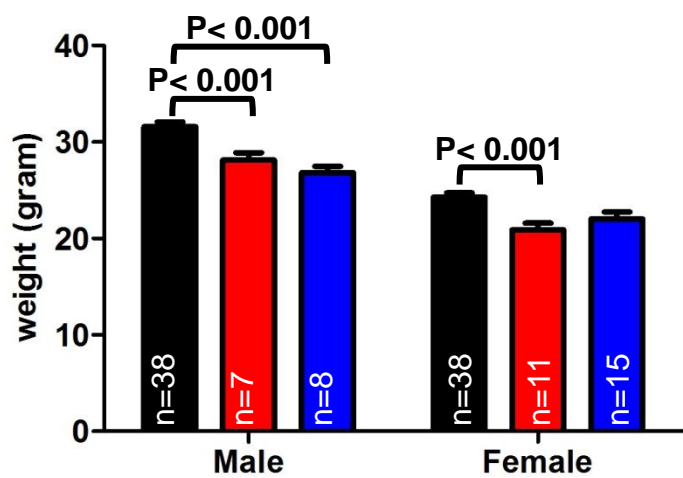

B

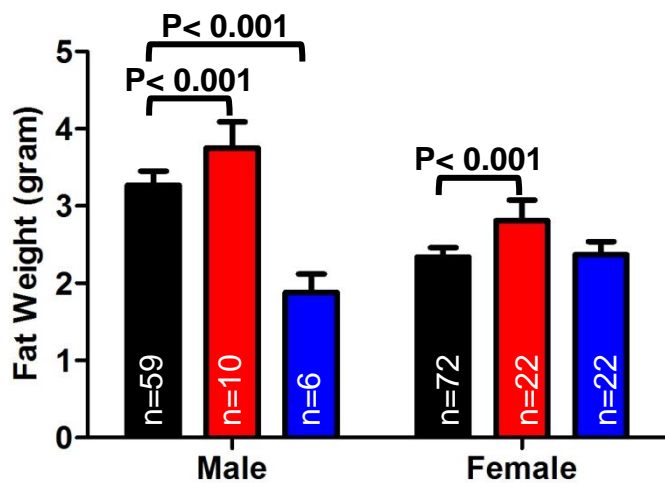

C

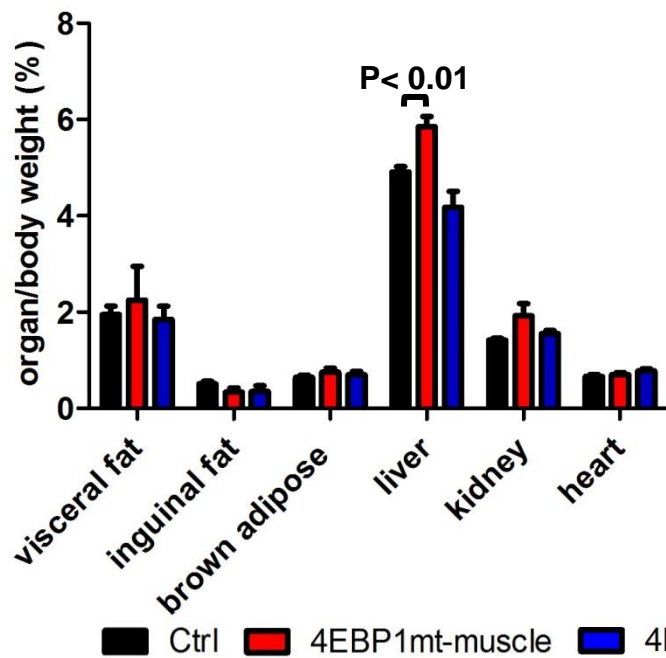

D

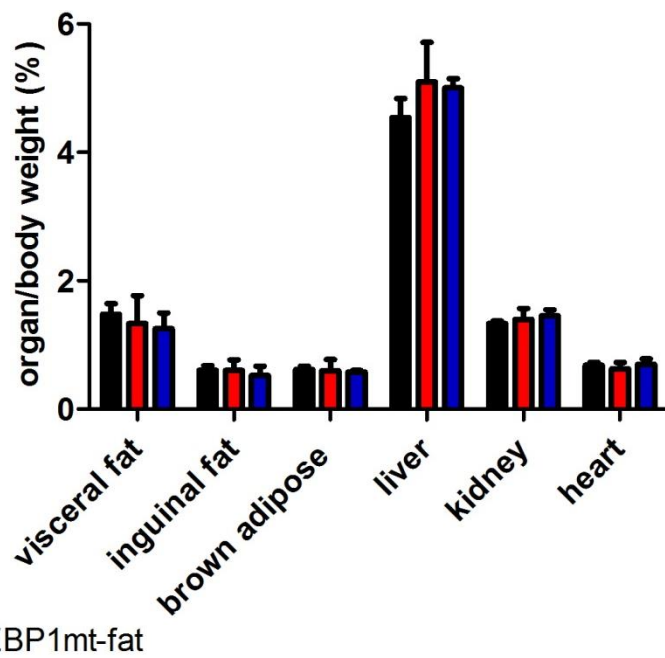

■ Ctrl ■ 4EBP1mt-muscle ■ 4EBP1mt-fat



**A**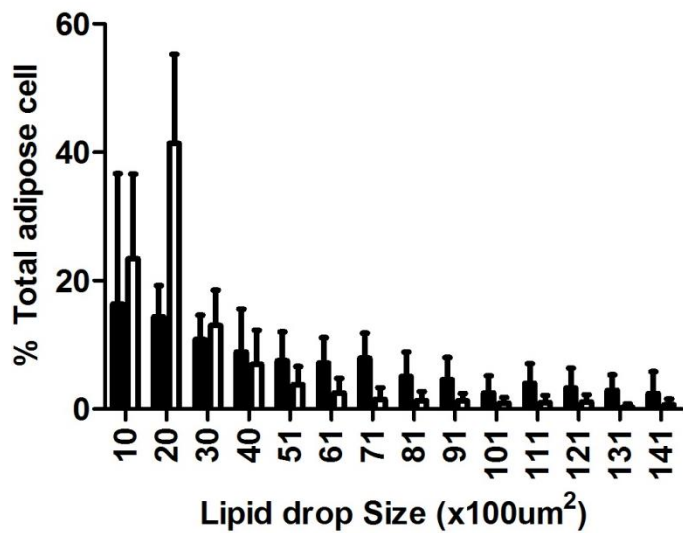**B**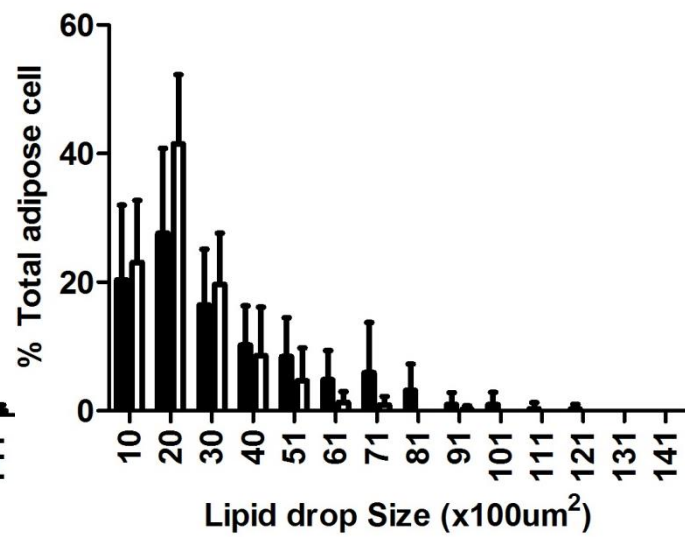

■ Ctrl  
□ 4EBP1mt-muscle

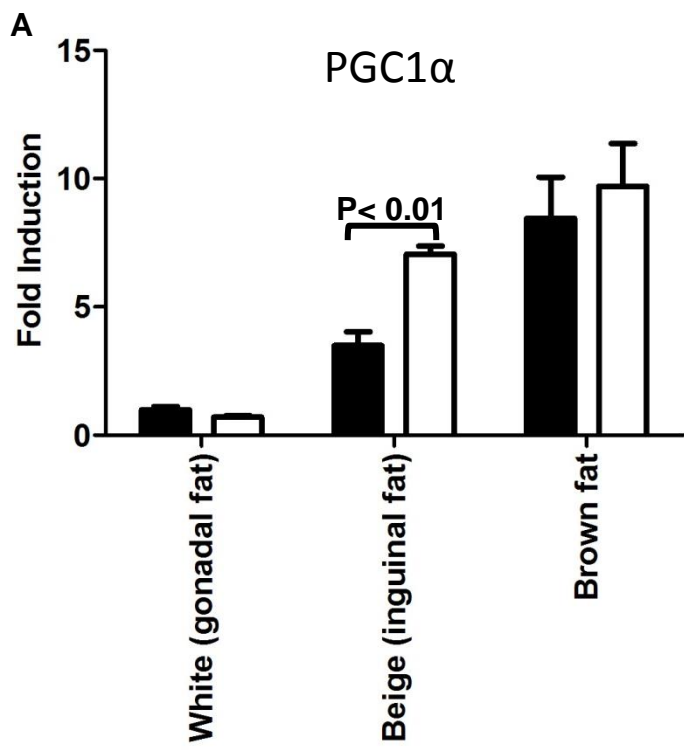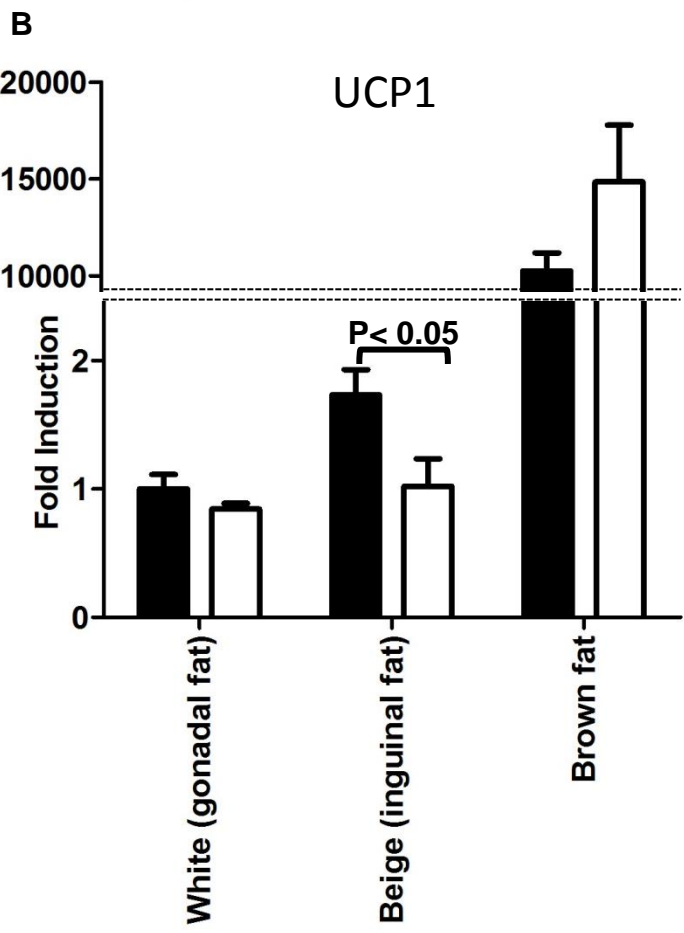

■ Ctrl □ 4EBP1mt-muscle

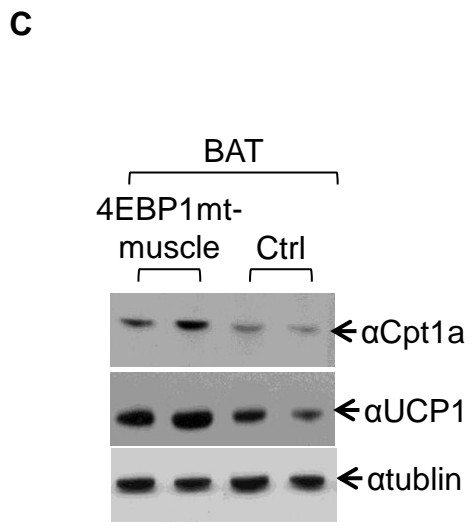

Supplementary Figure 8.

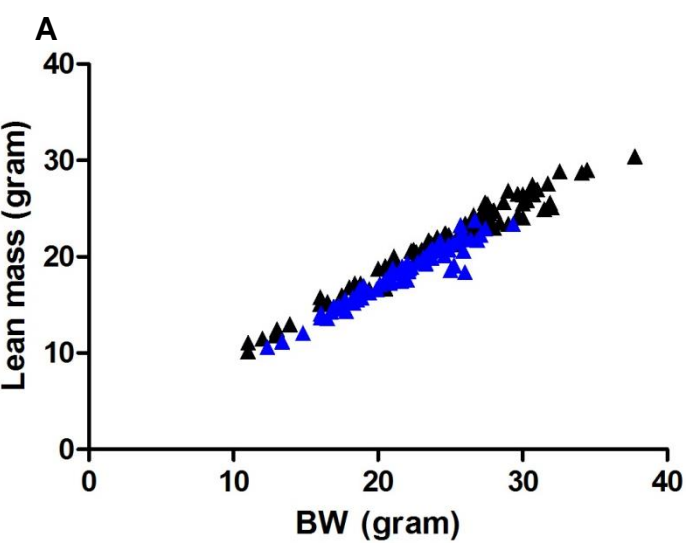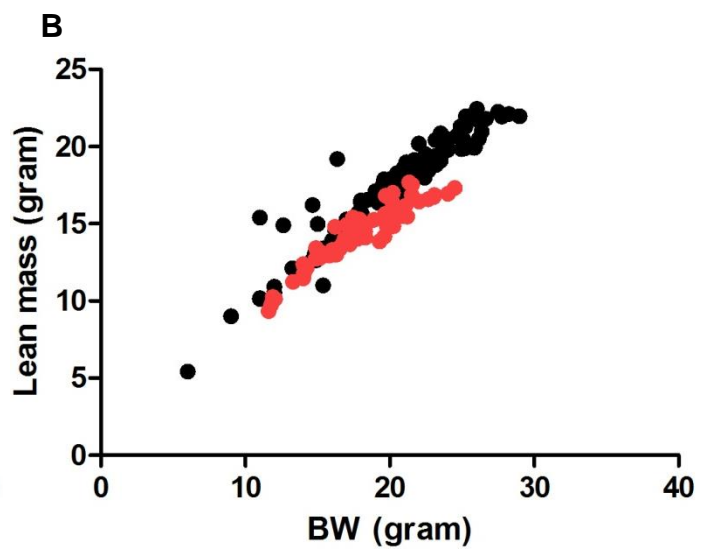

A

Quadriceps Muscle

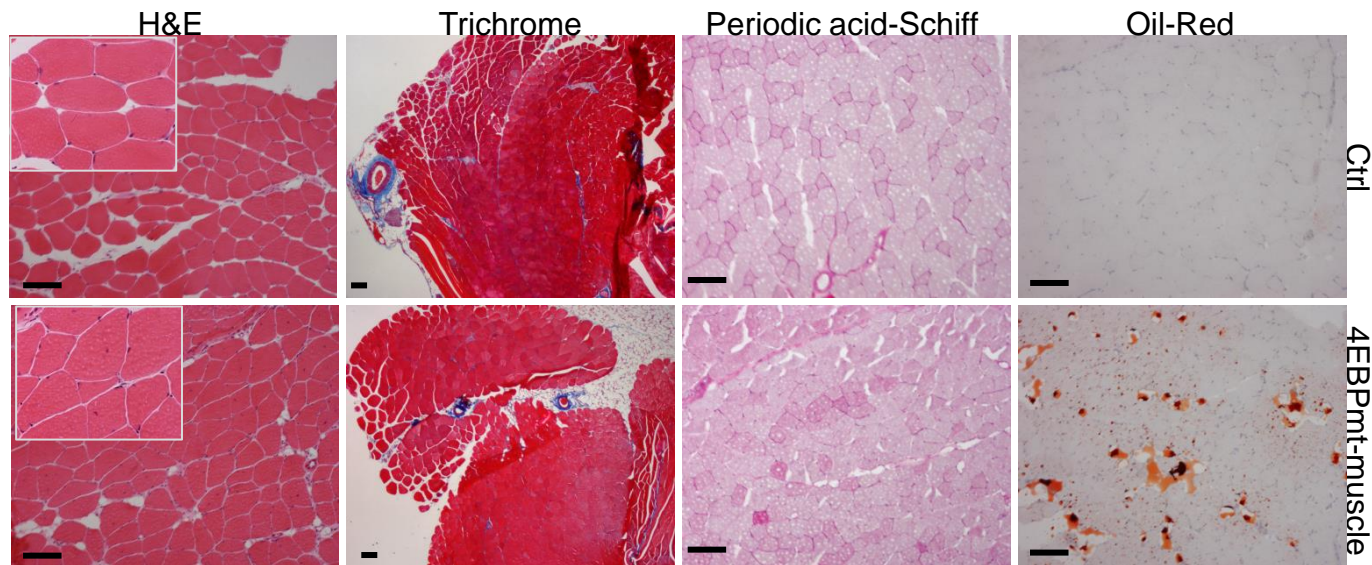

B

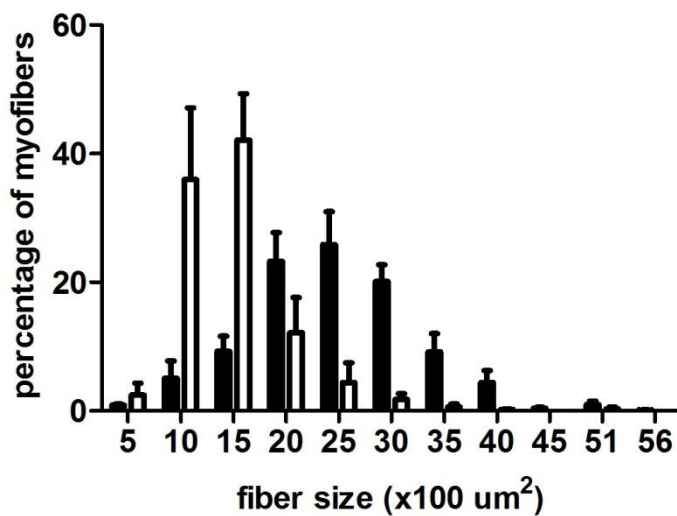

C

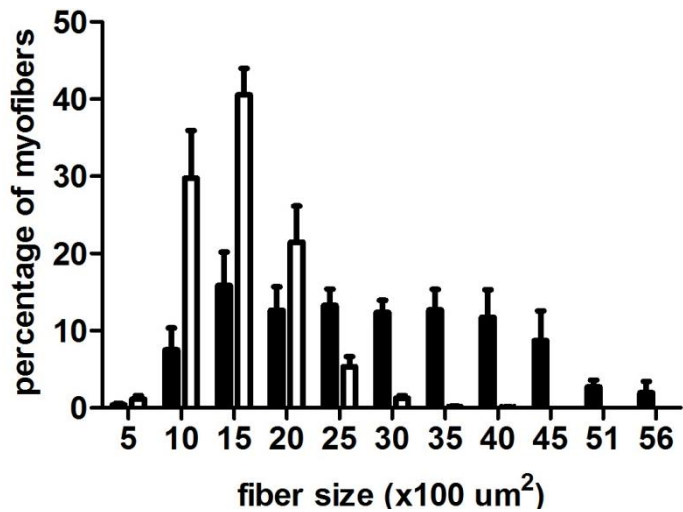

D

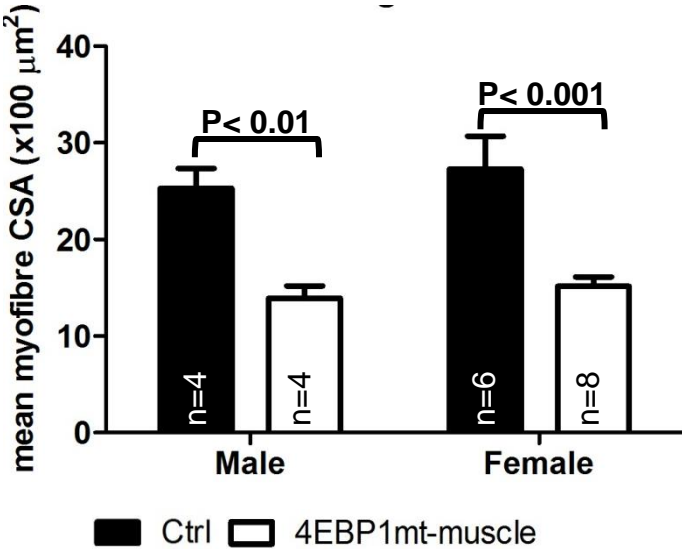

E

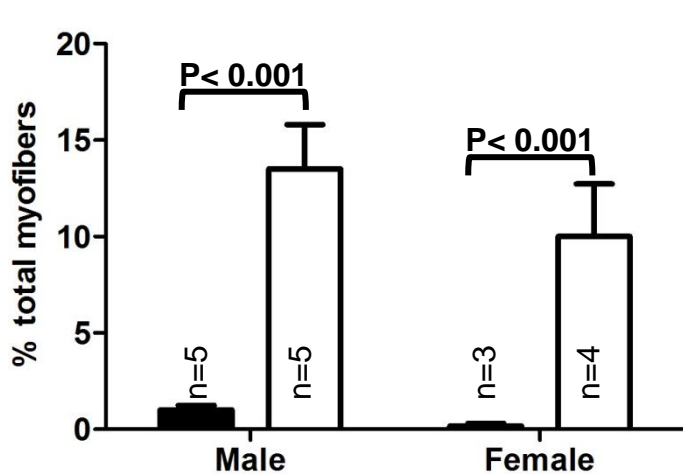

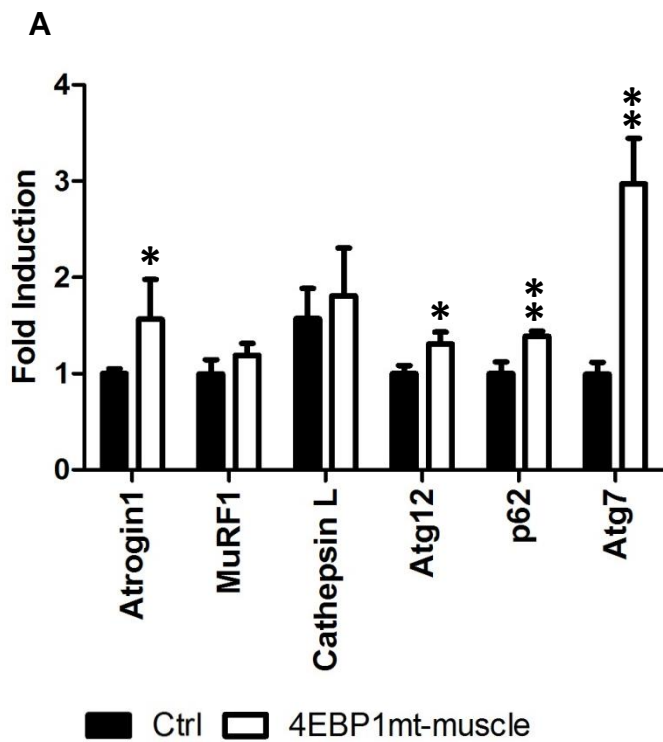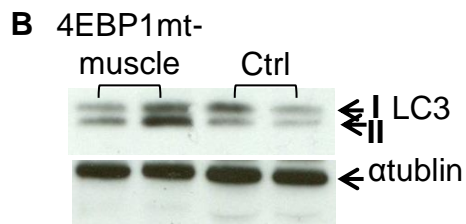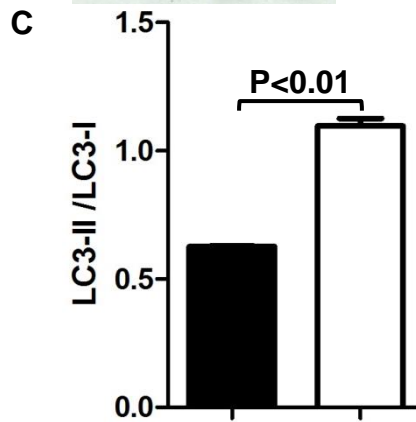

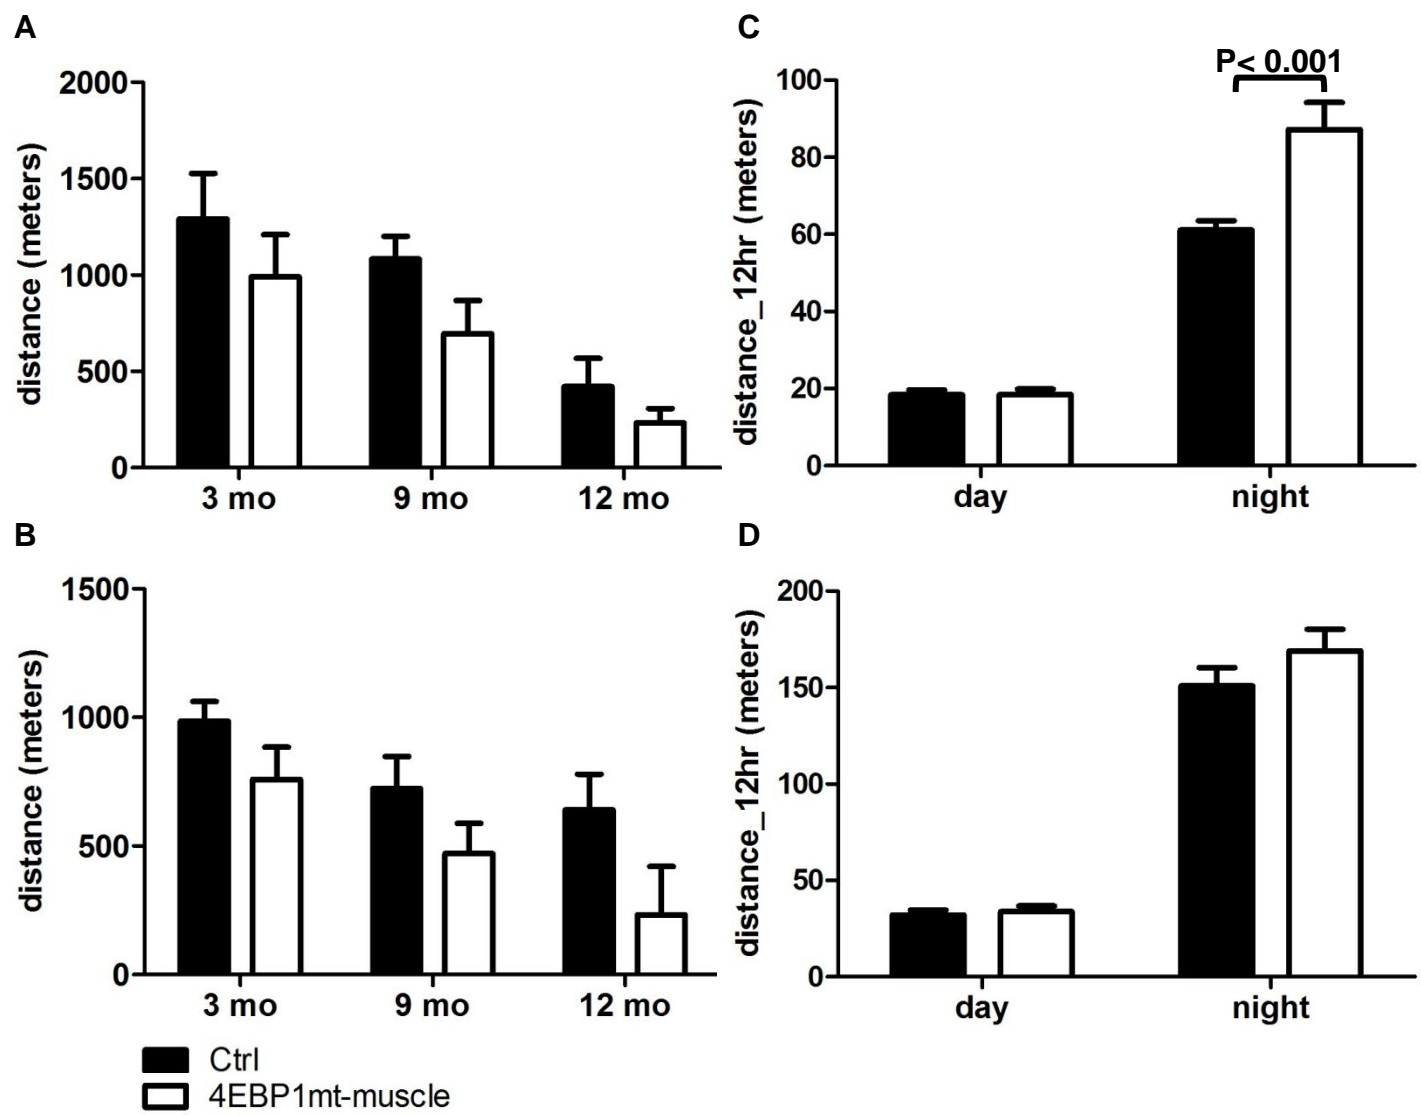

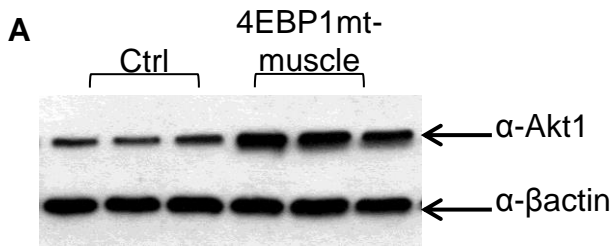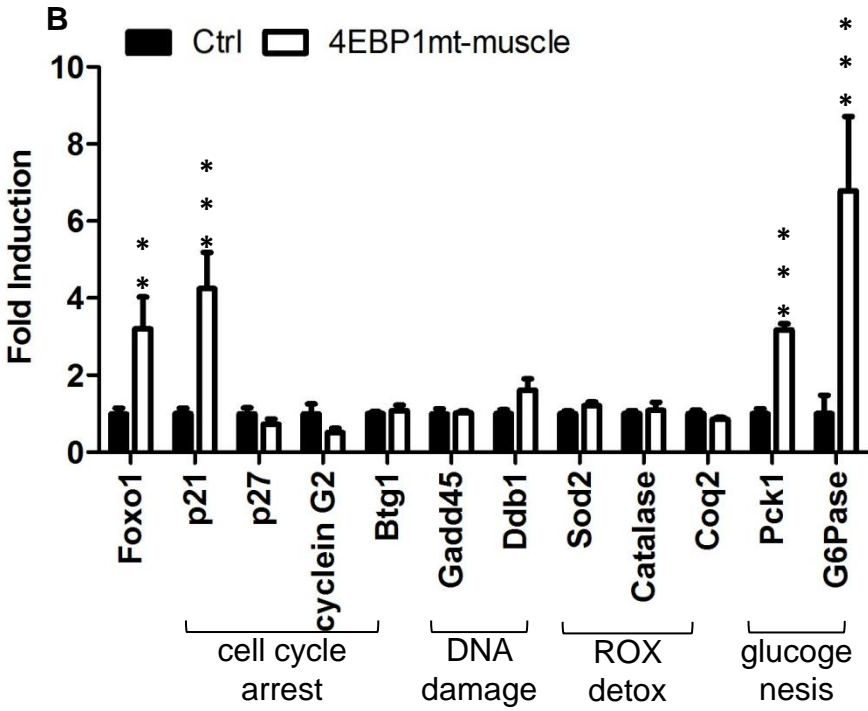

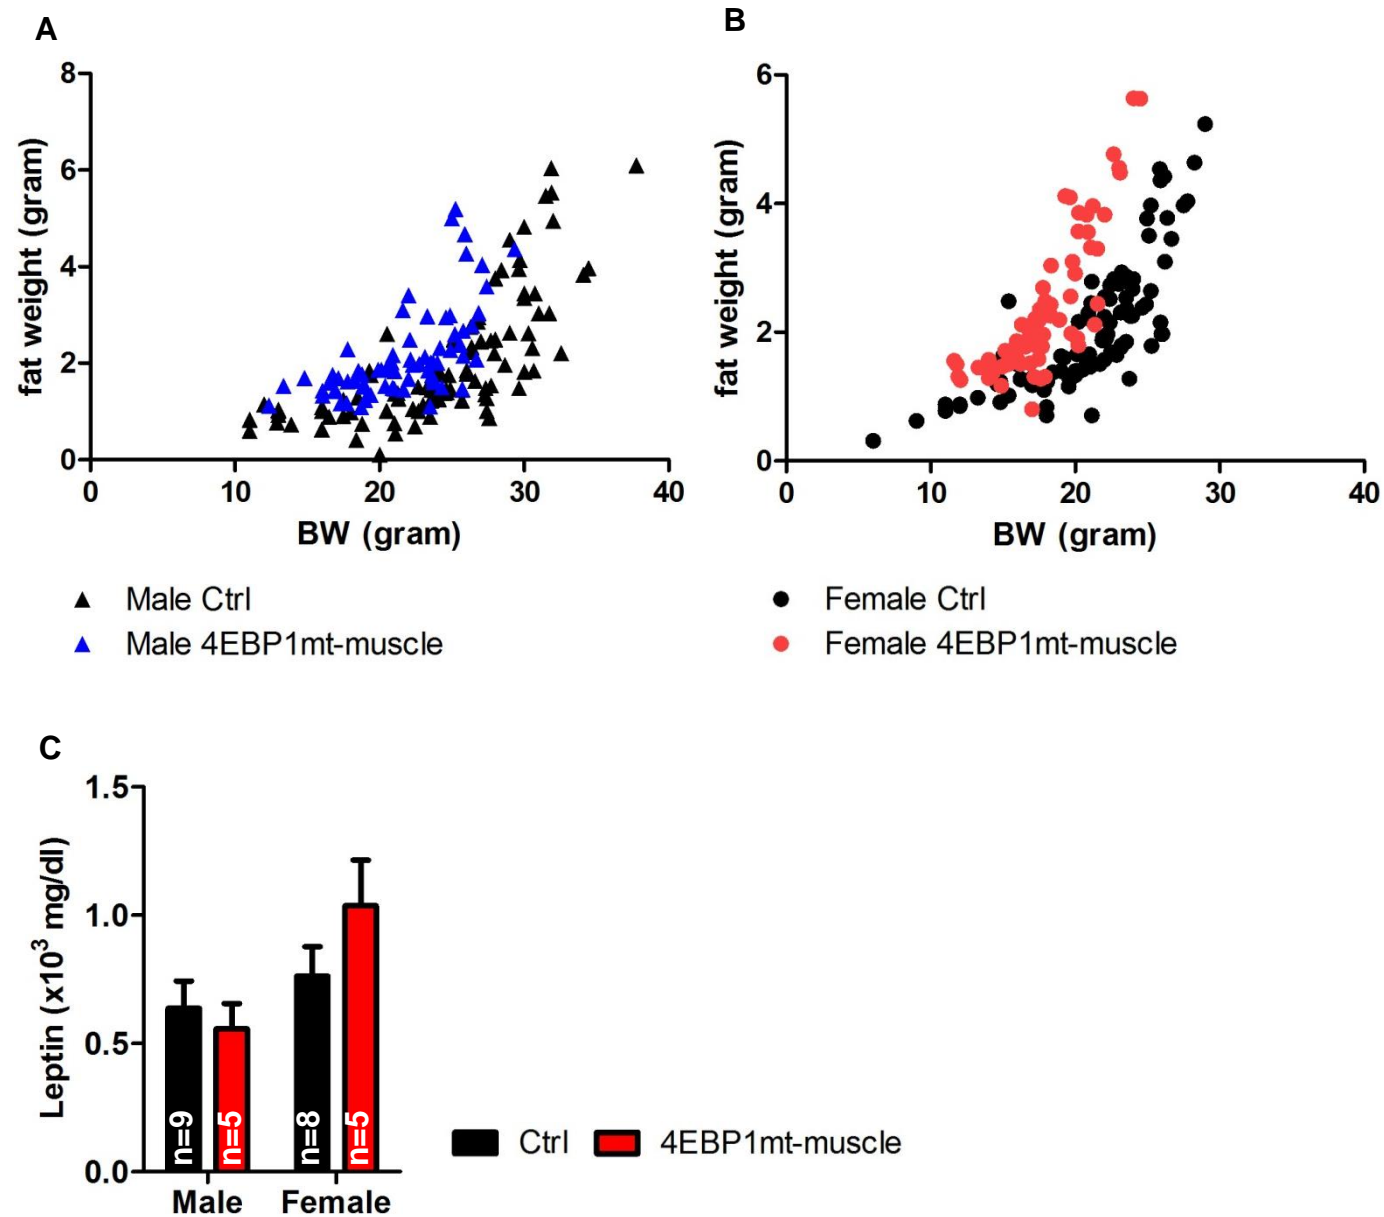



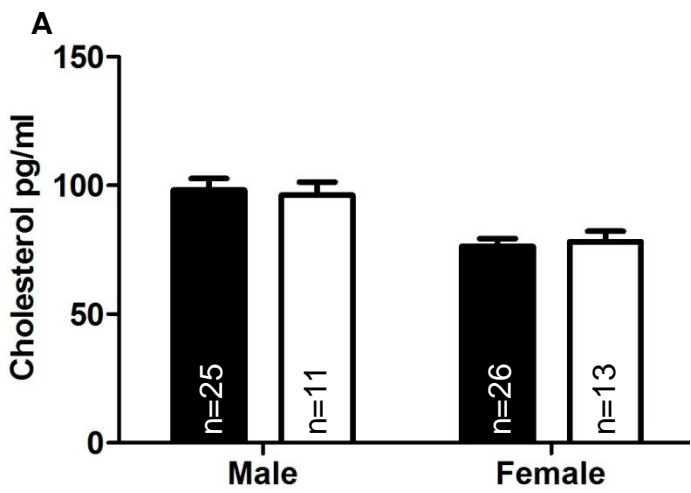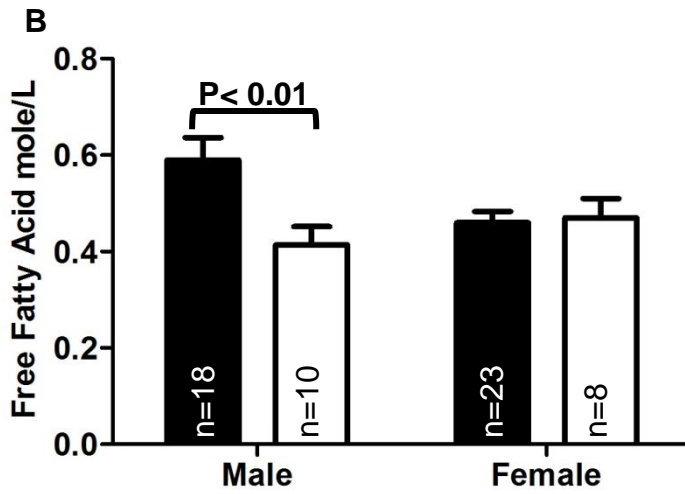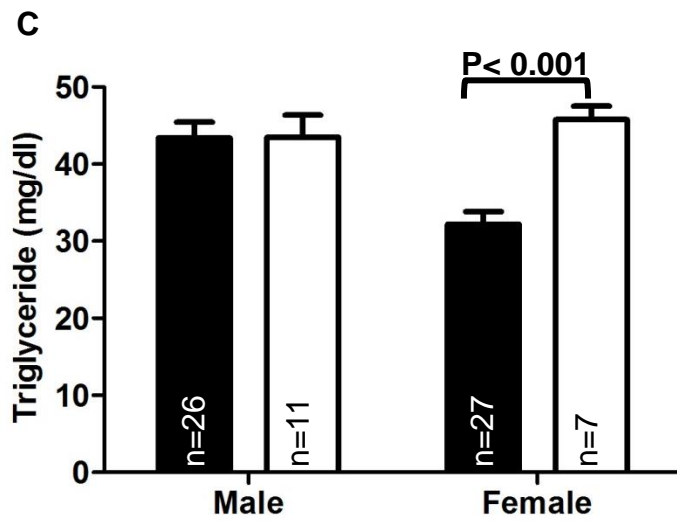

■ Ctrl □ 4EBP1mt-muscle

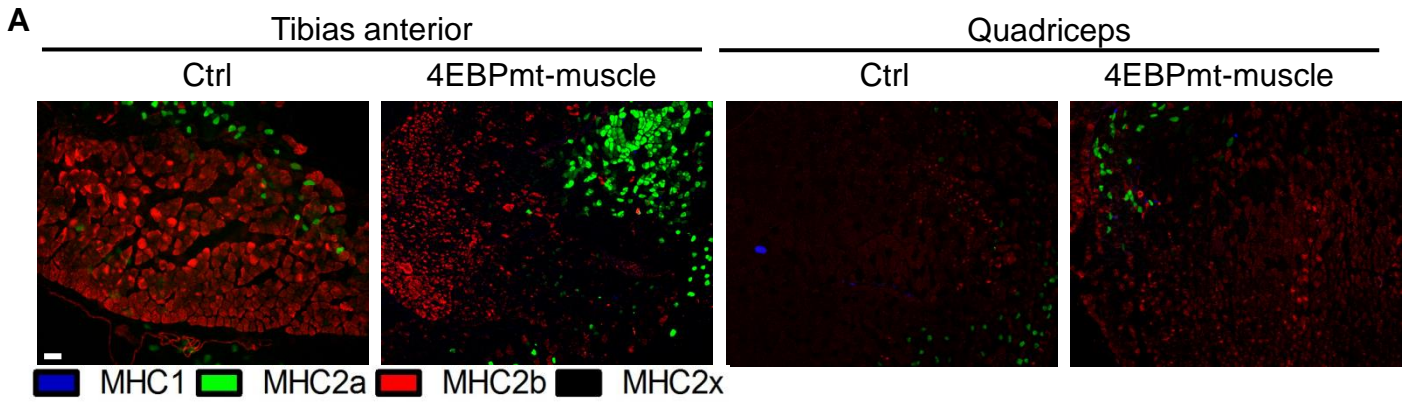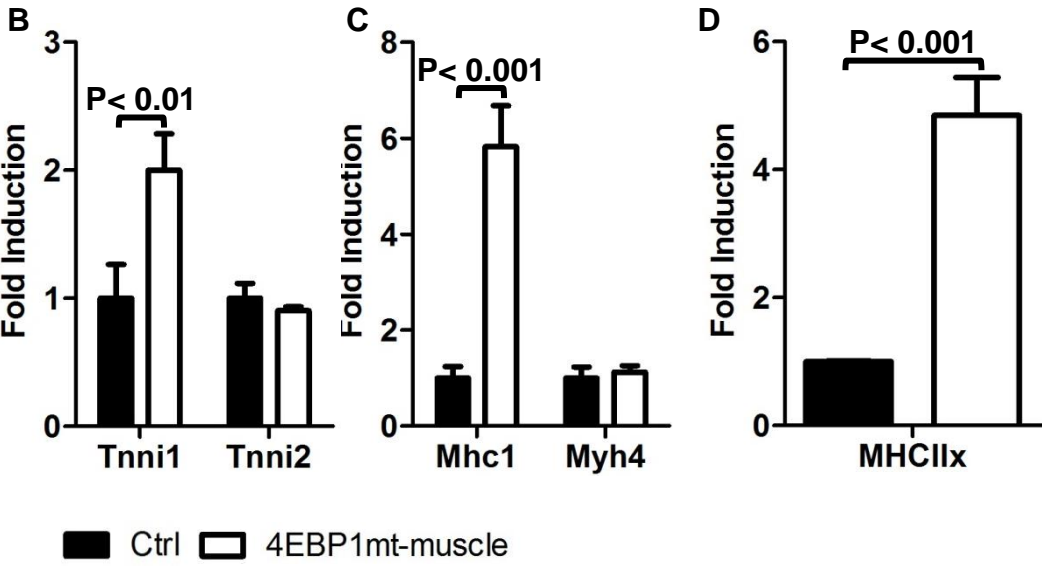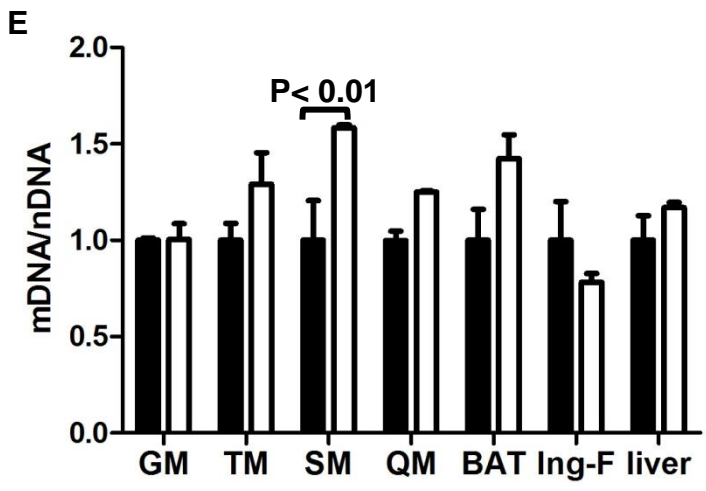

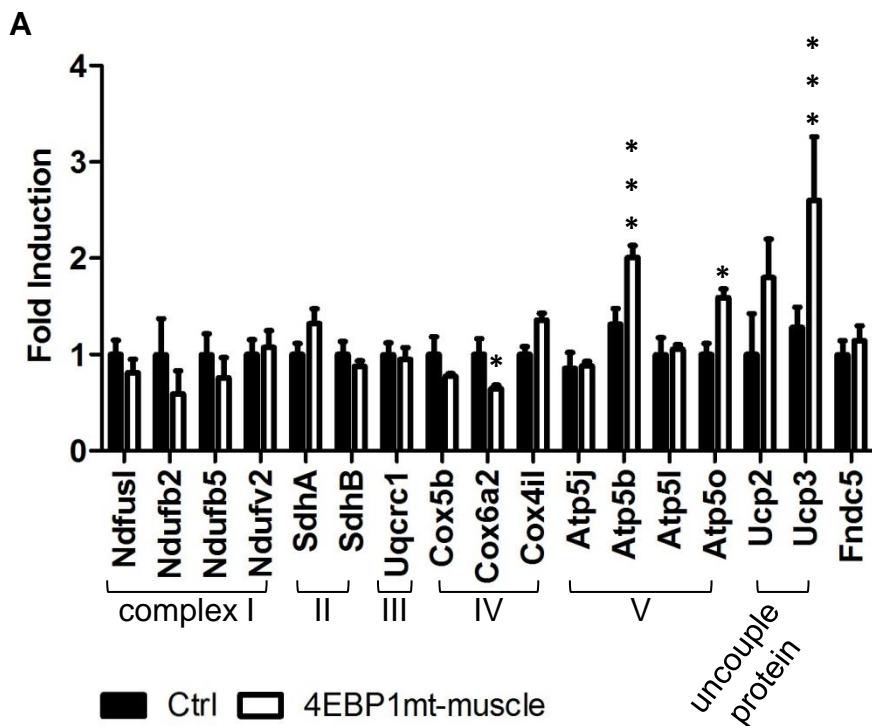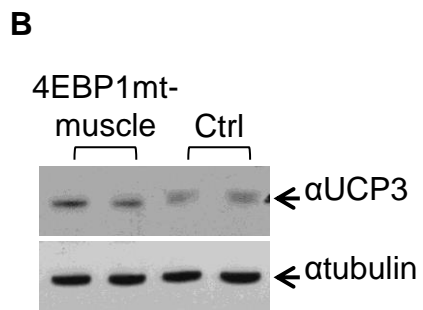

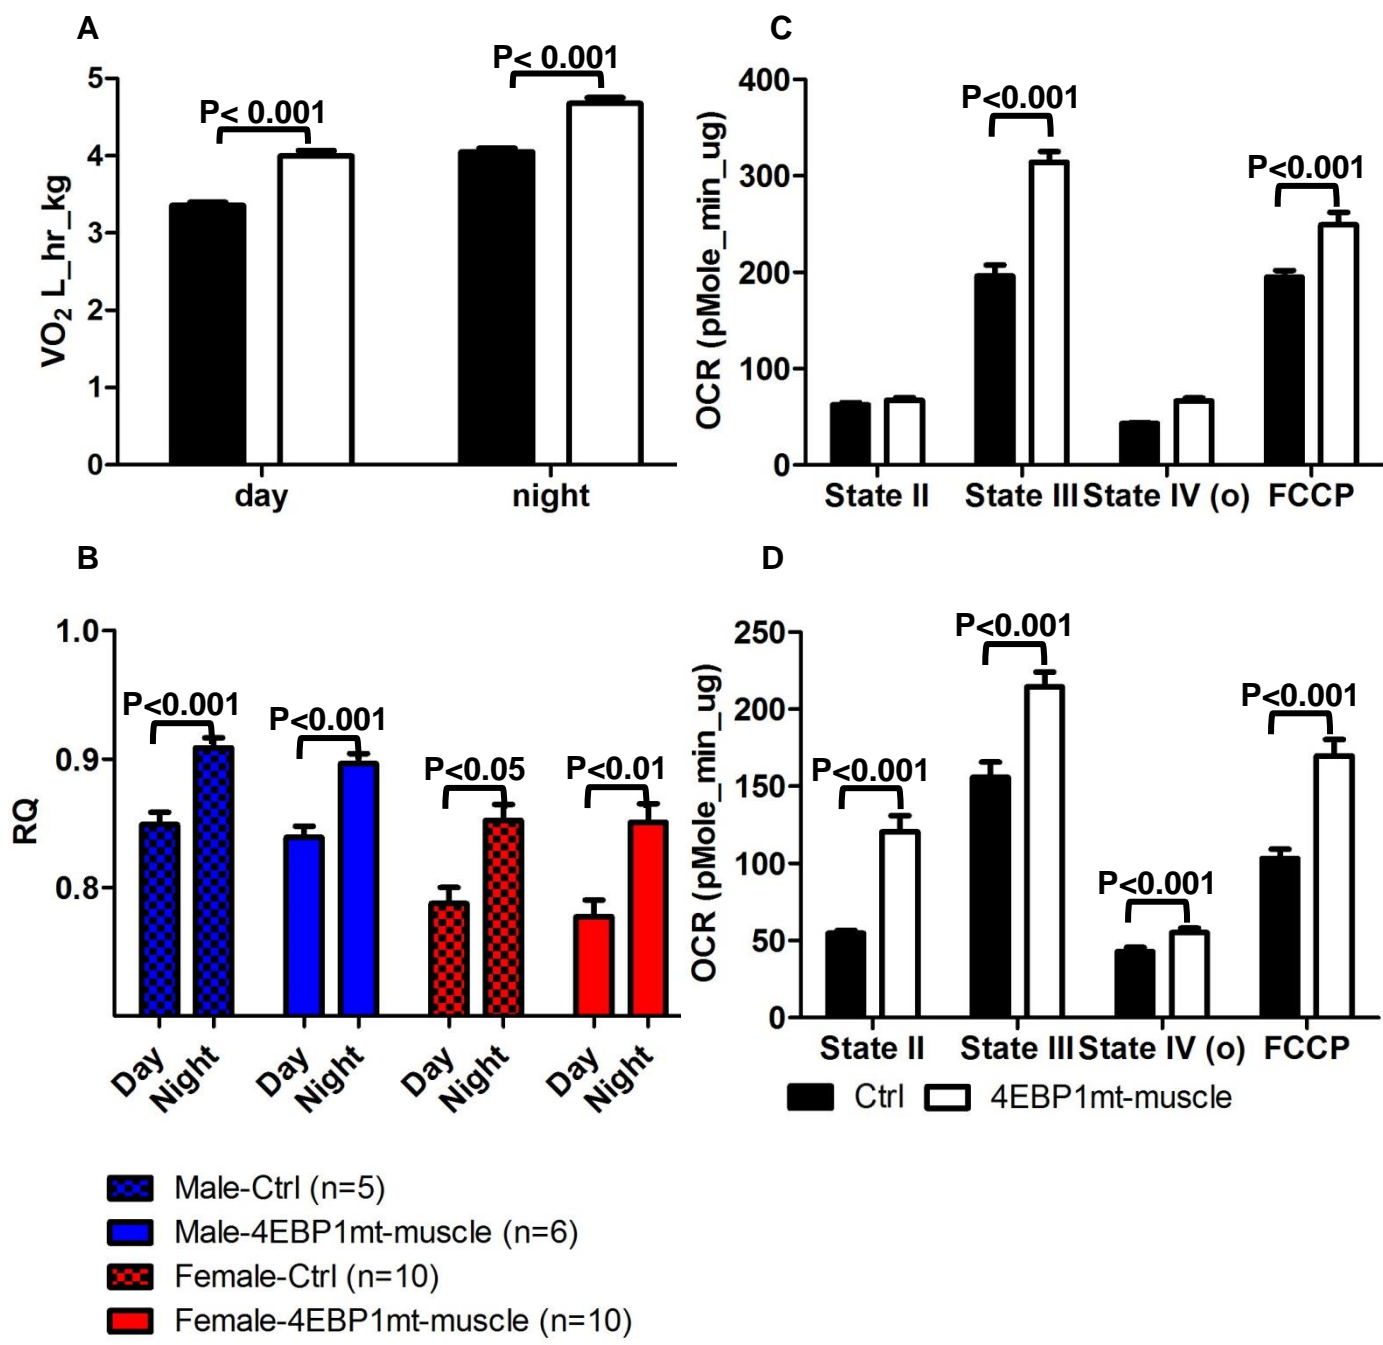

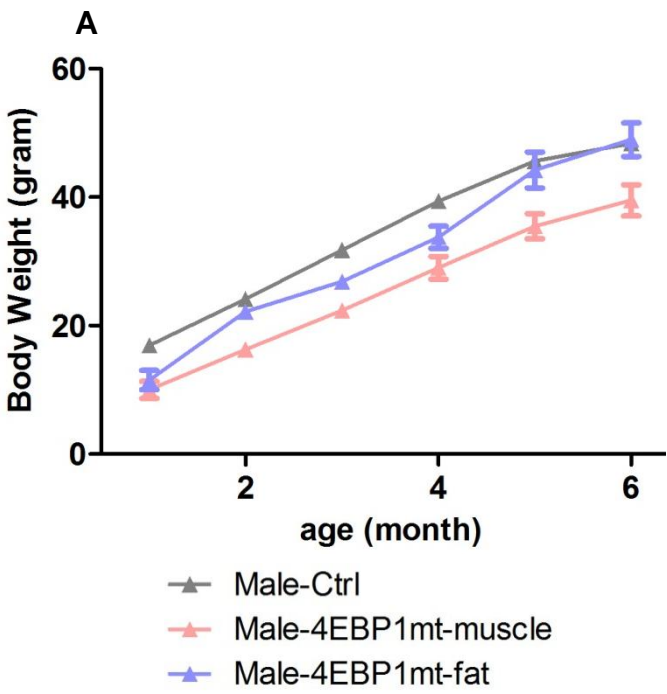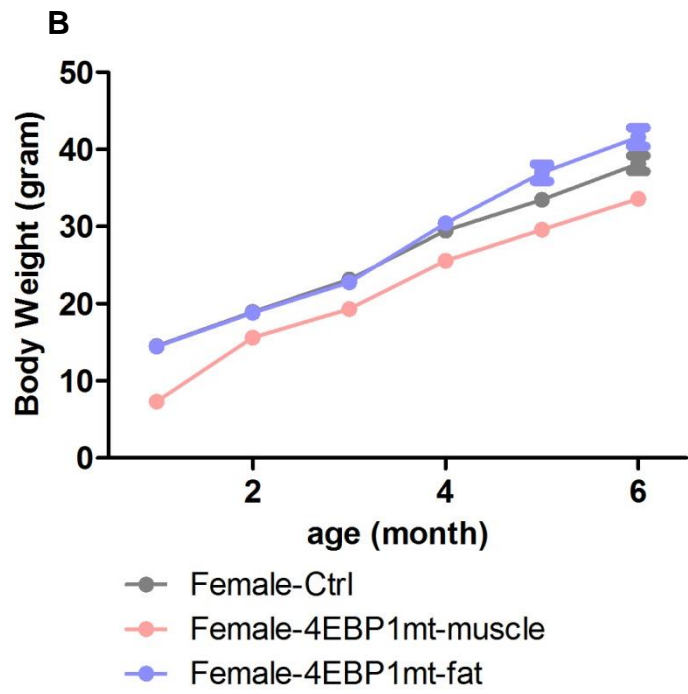

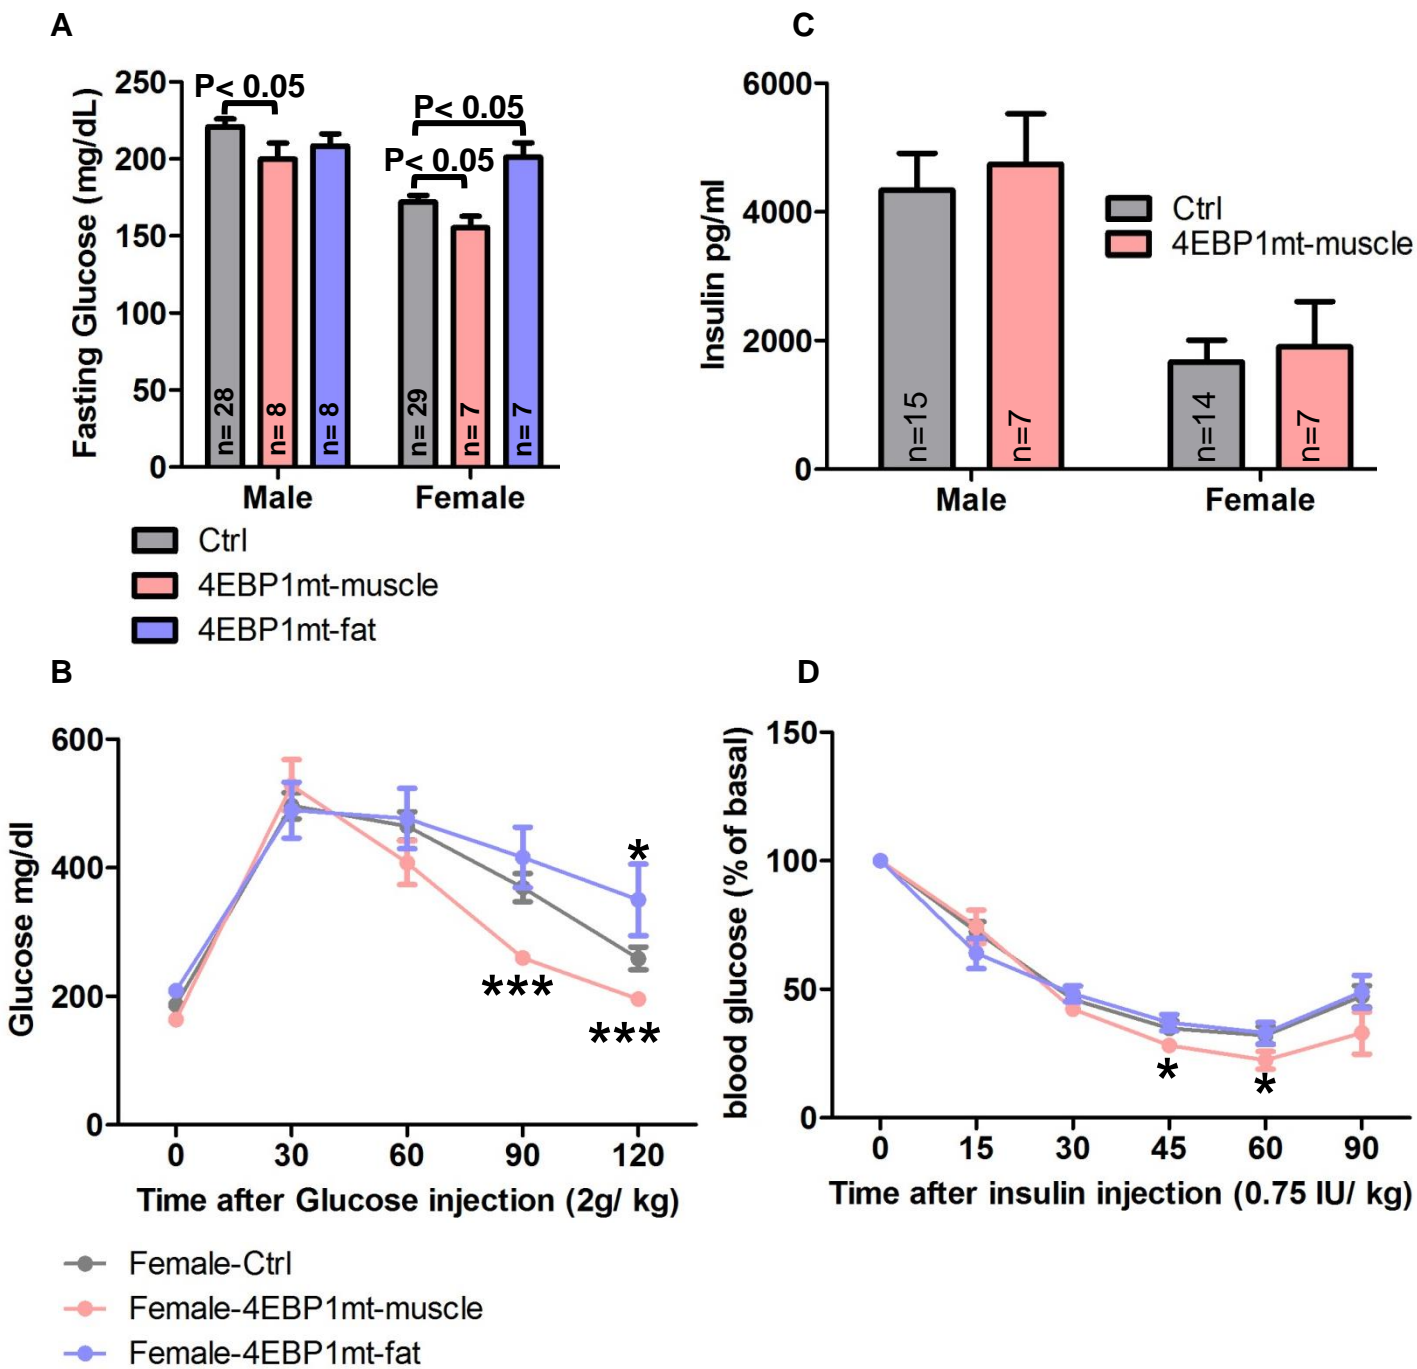

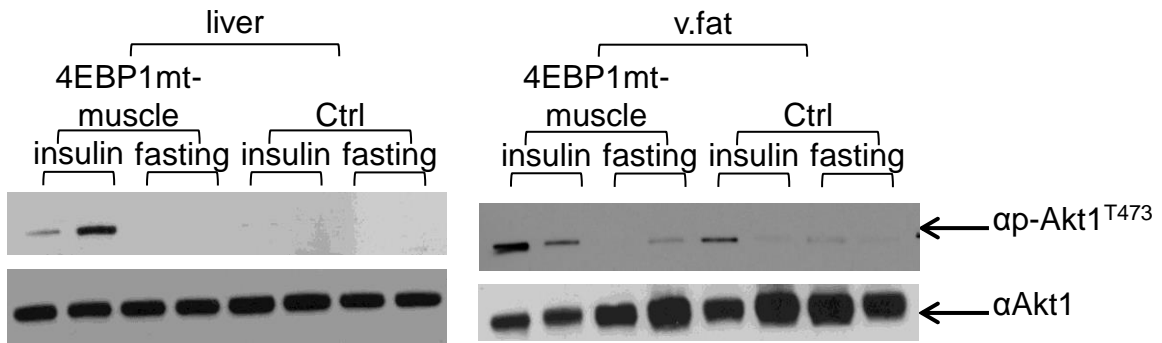

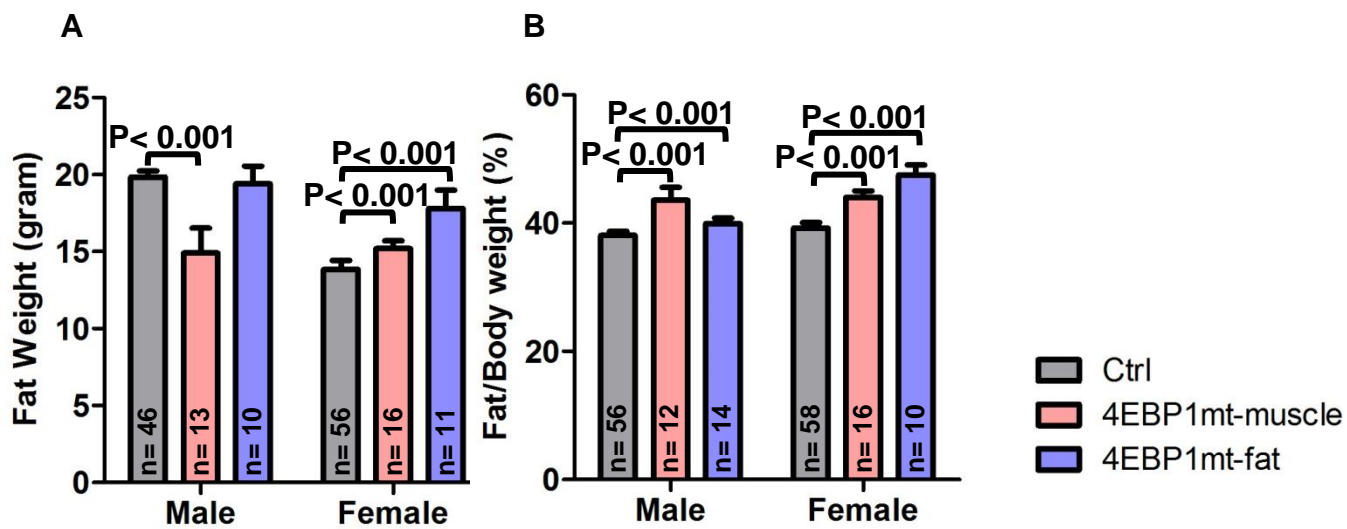



# UCP1

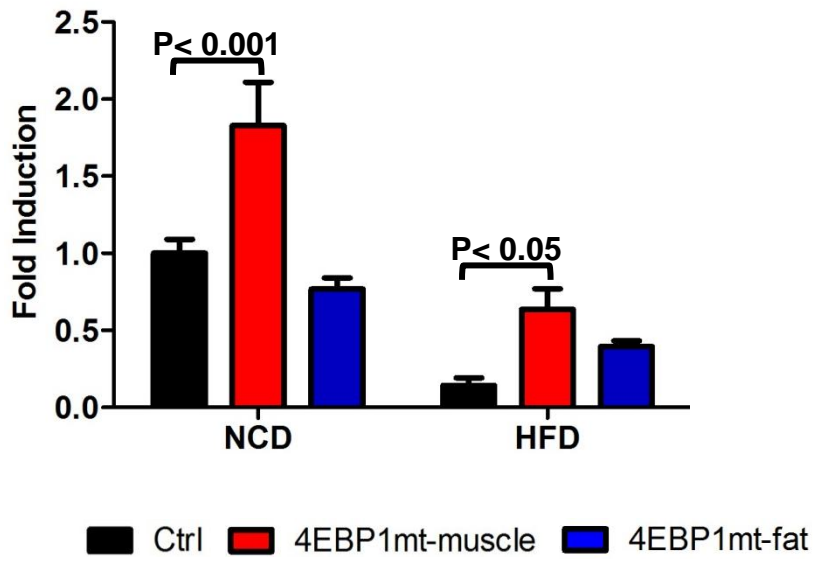

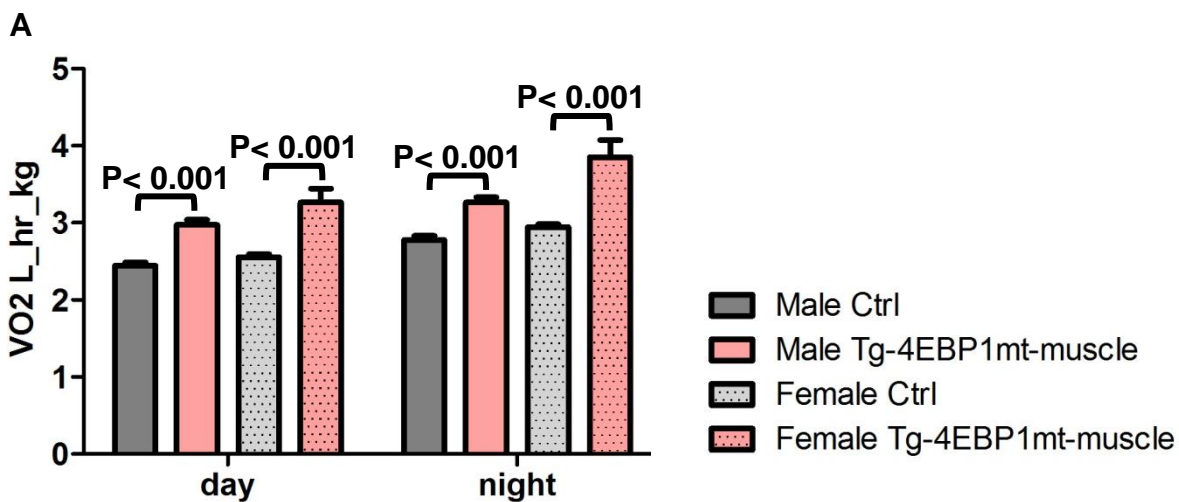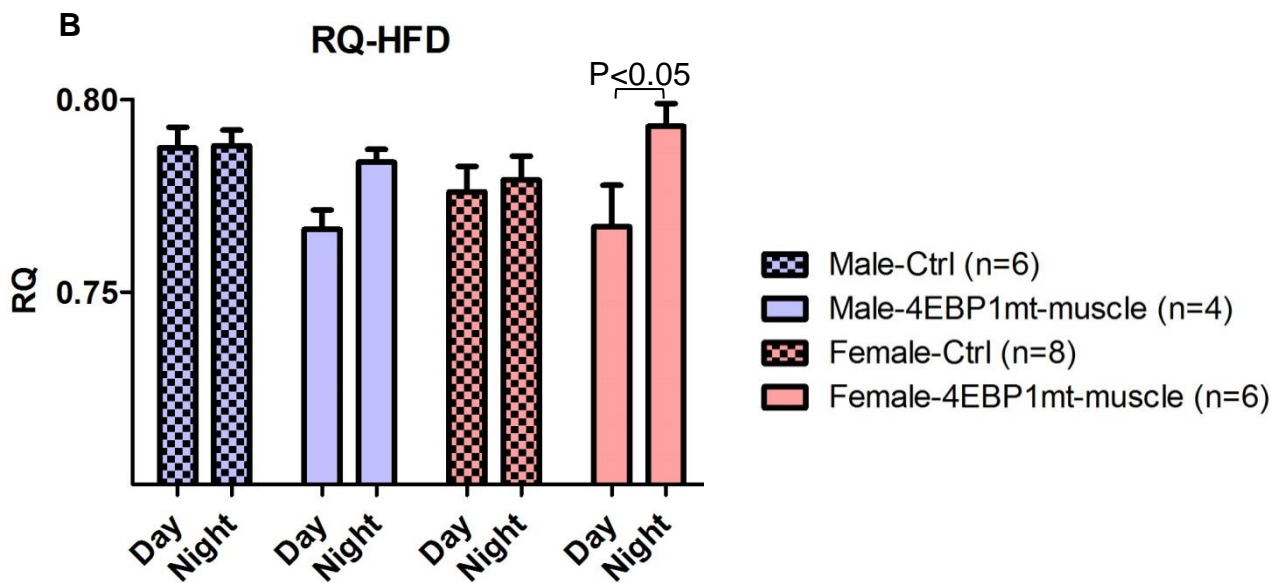

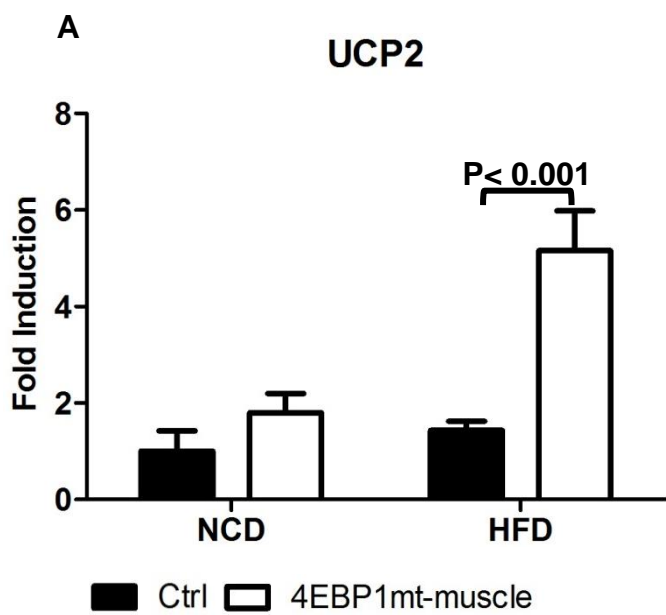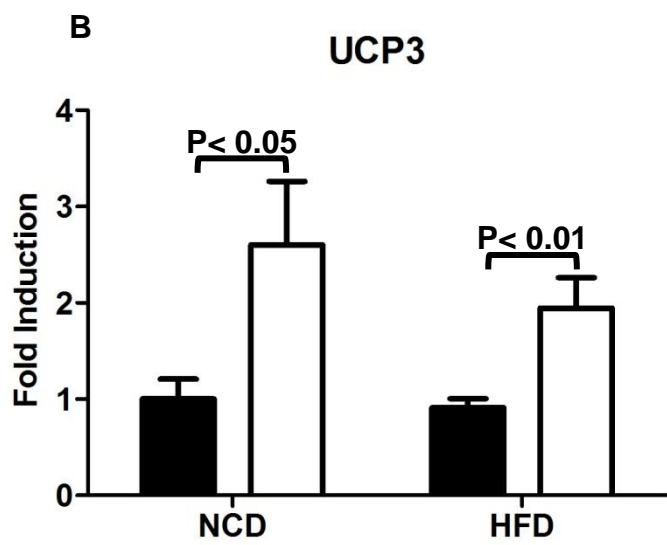

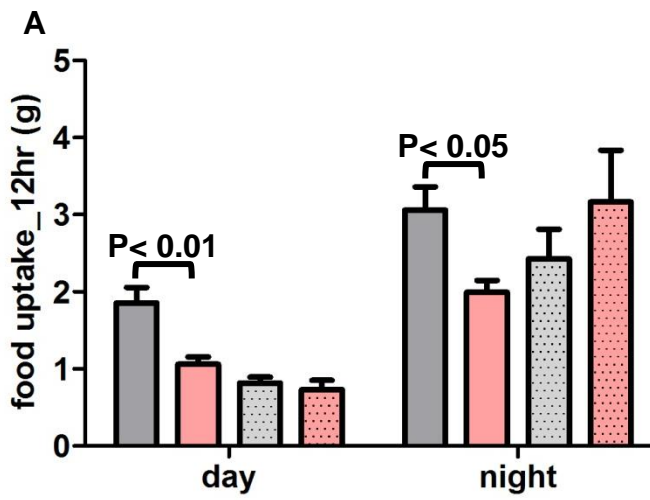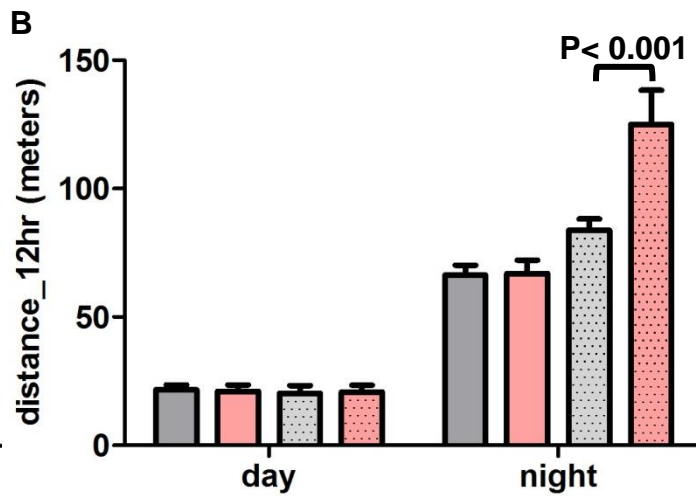

- Male Ctrl
- Male Tg-4EBP1mt-muscle
- Female Ctrl
- Female Tg-4EBP1mt-muscle

# aging-Q muscle-male

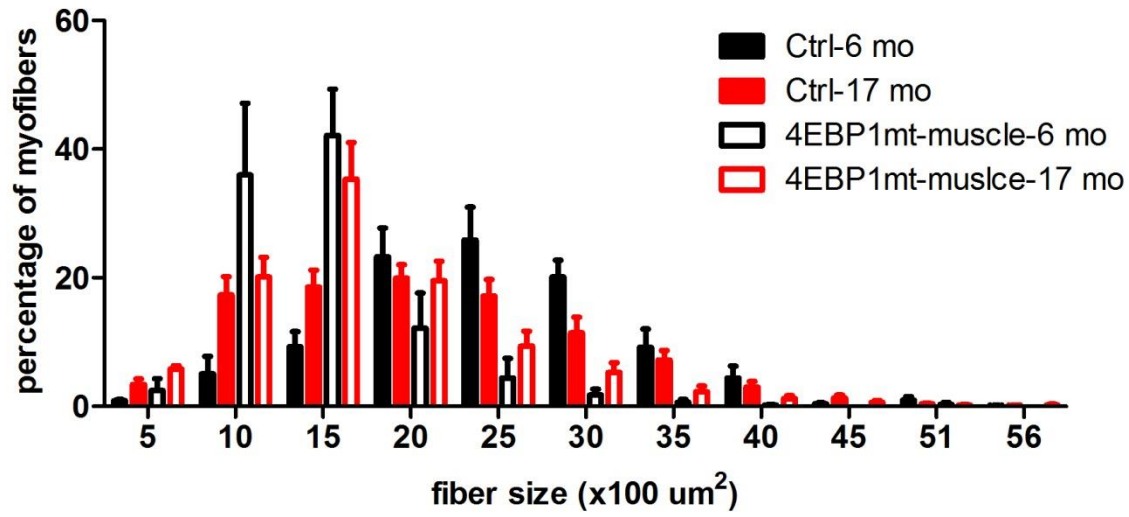

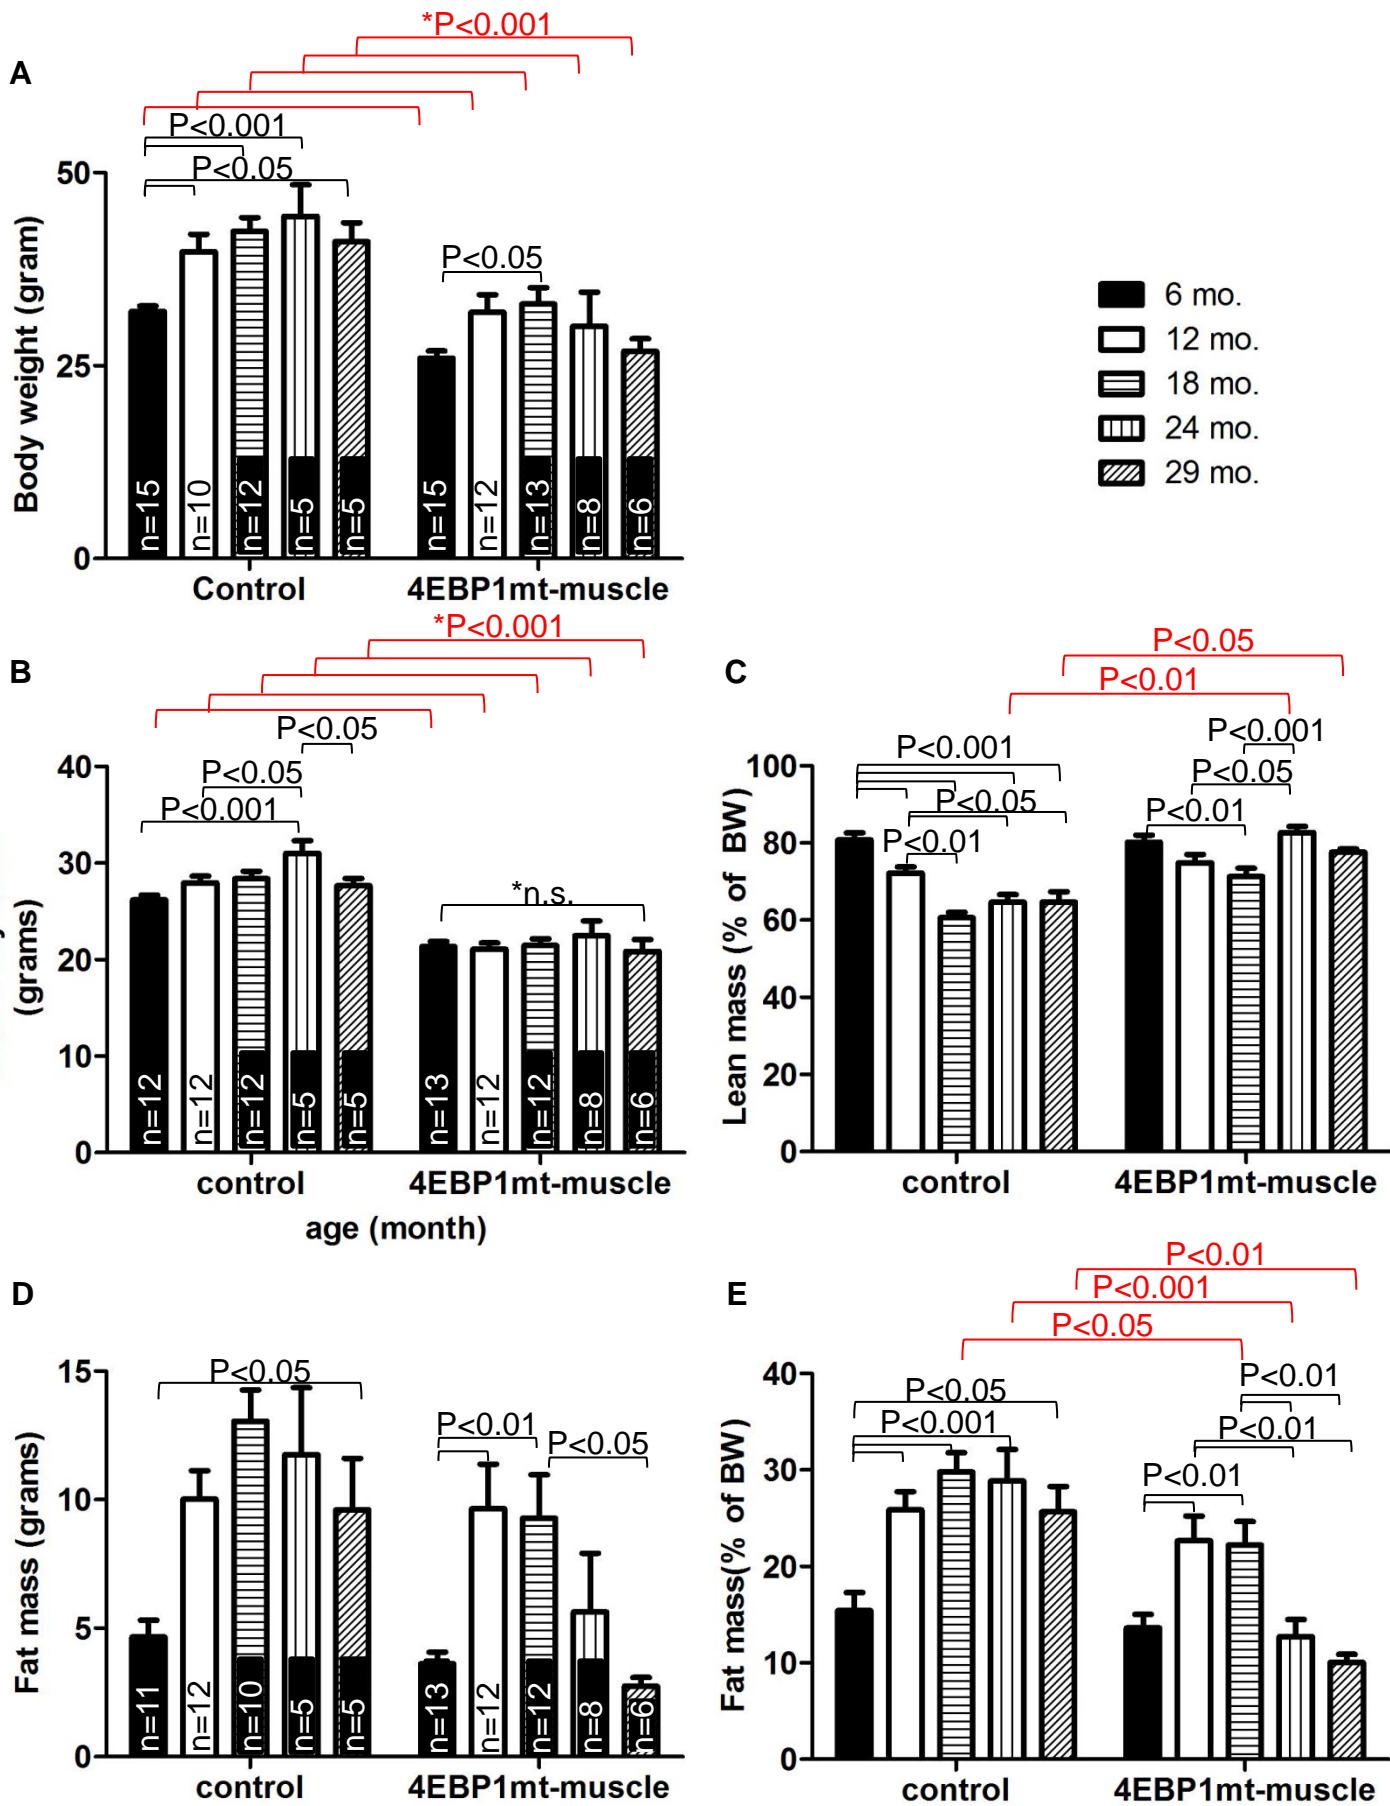

Supplementary Figure 28

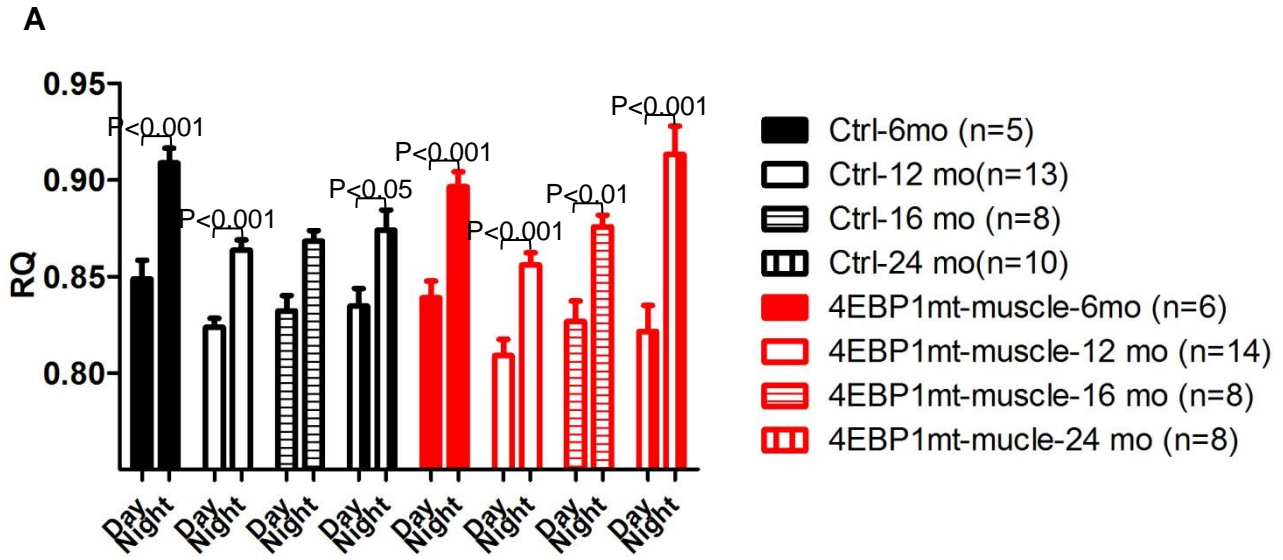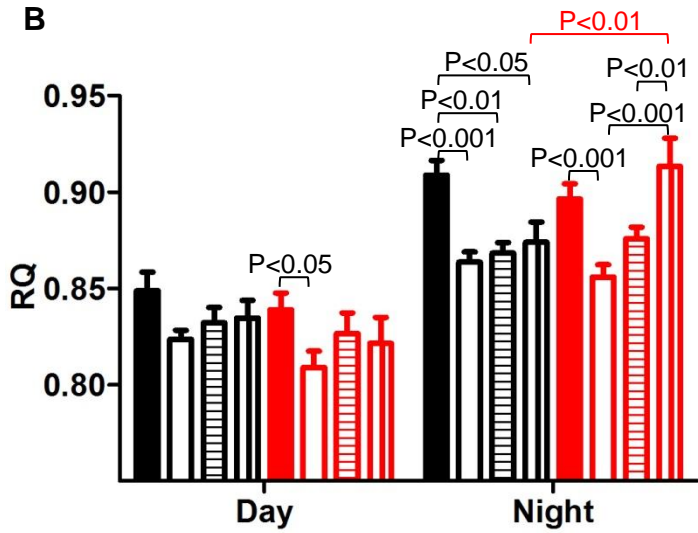

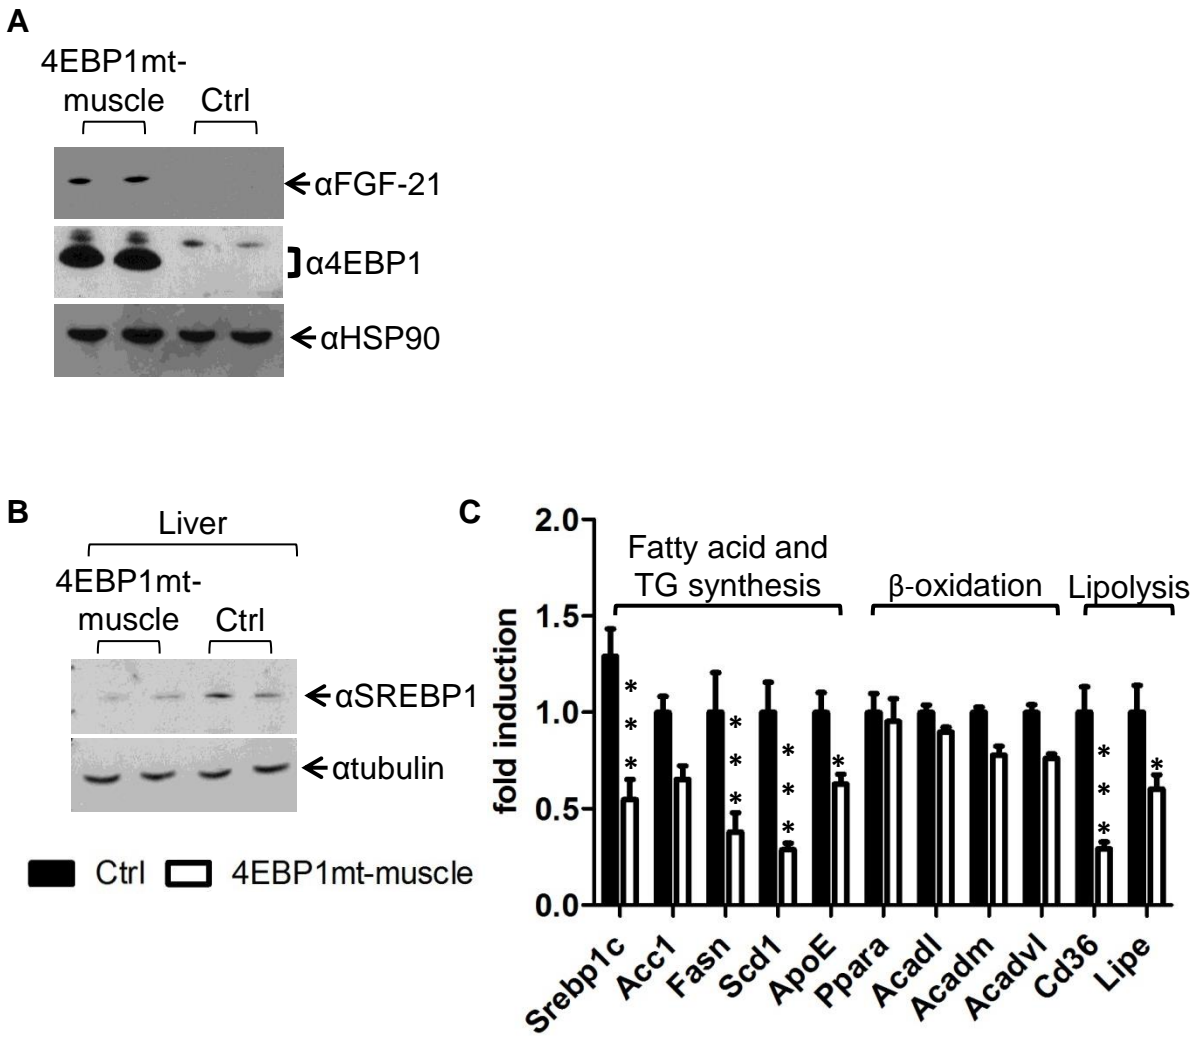



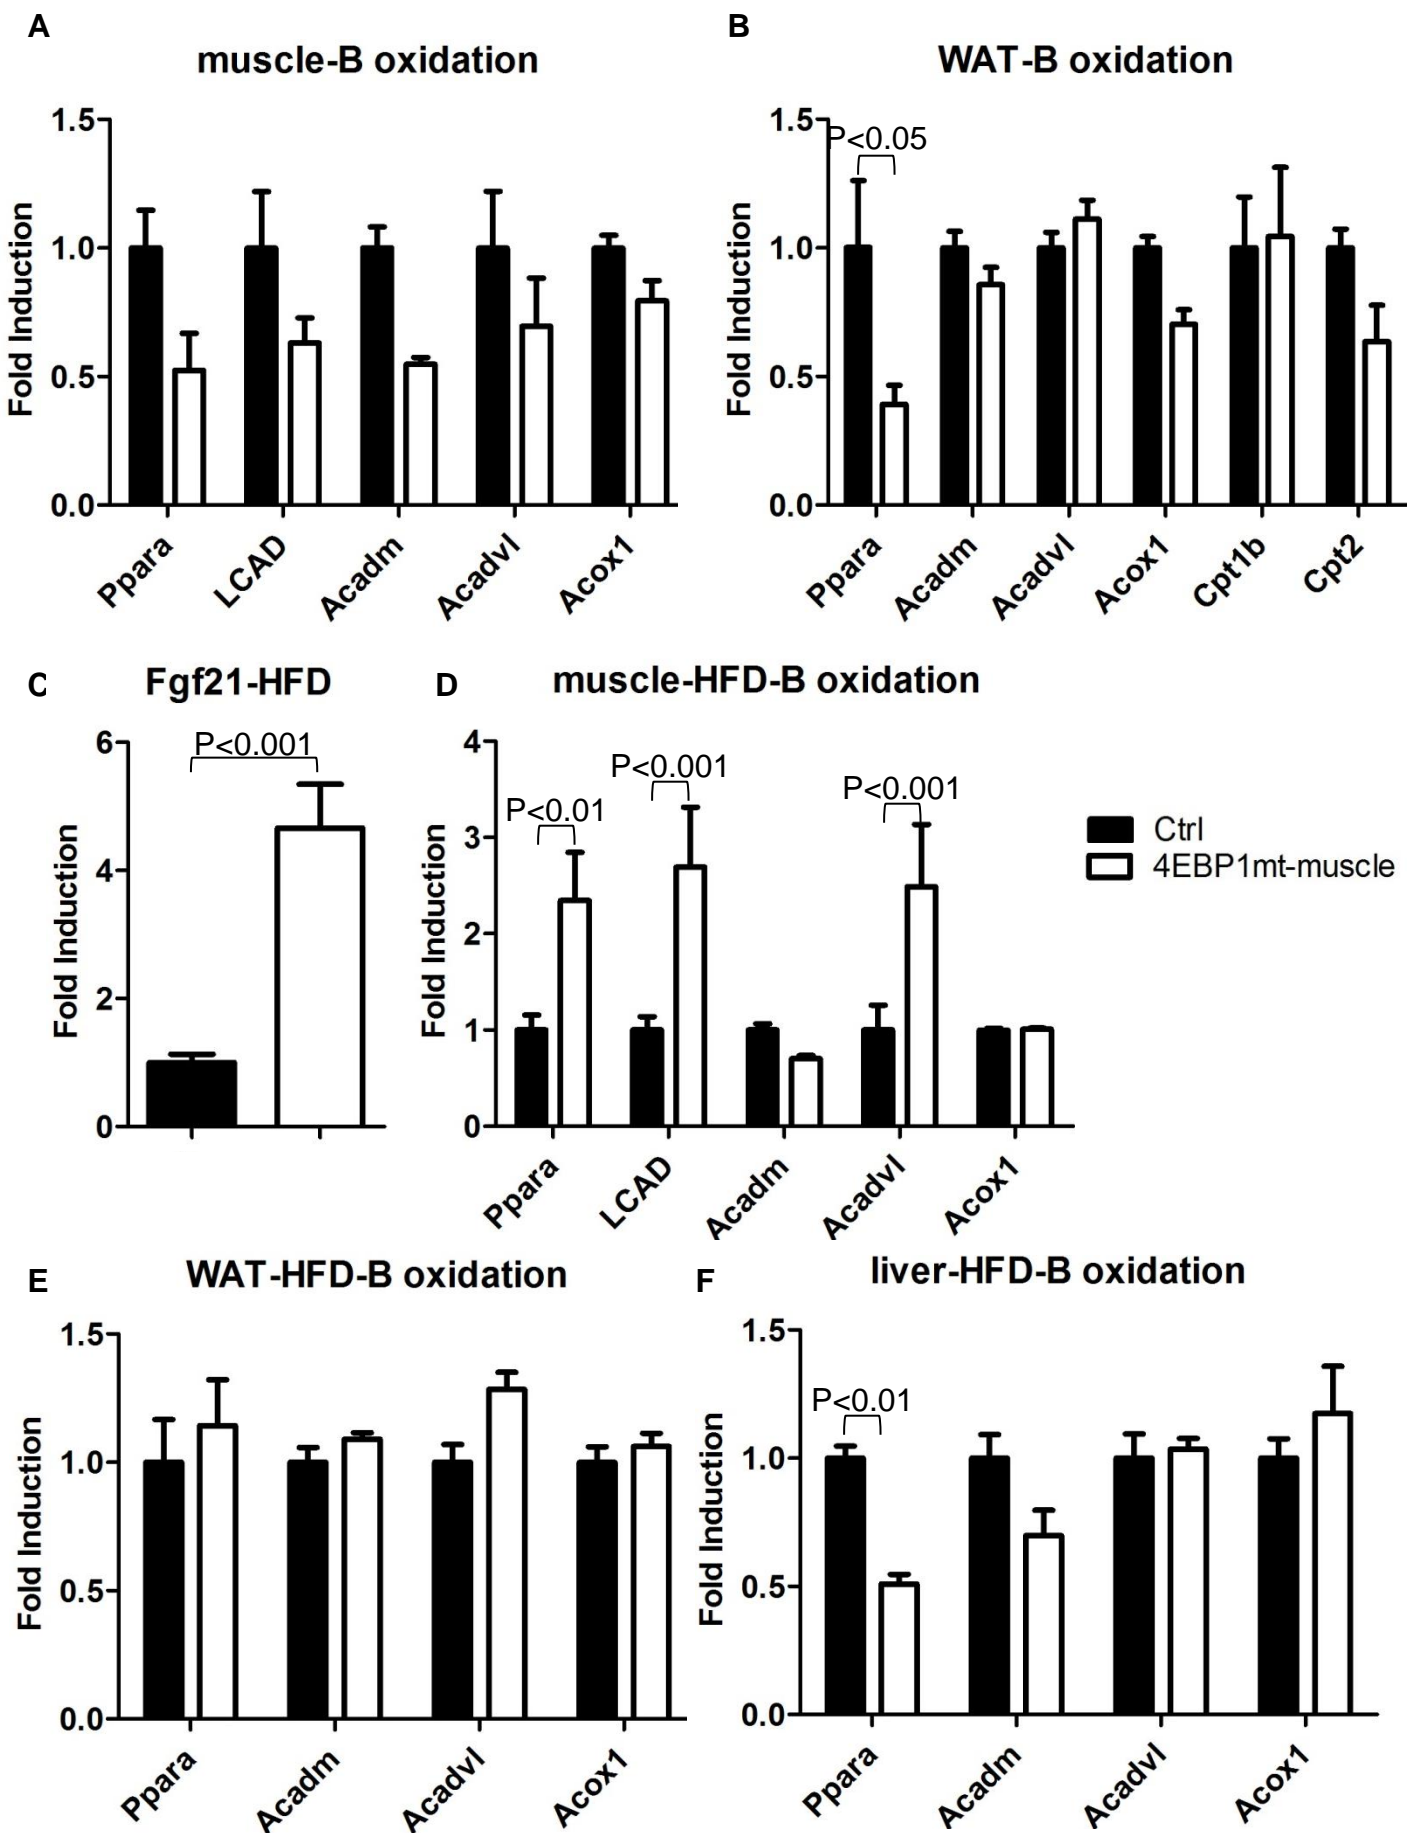

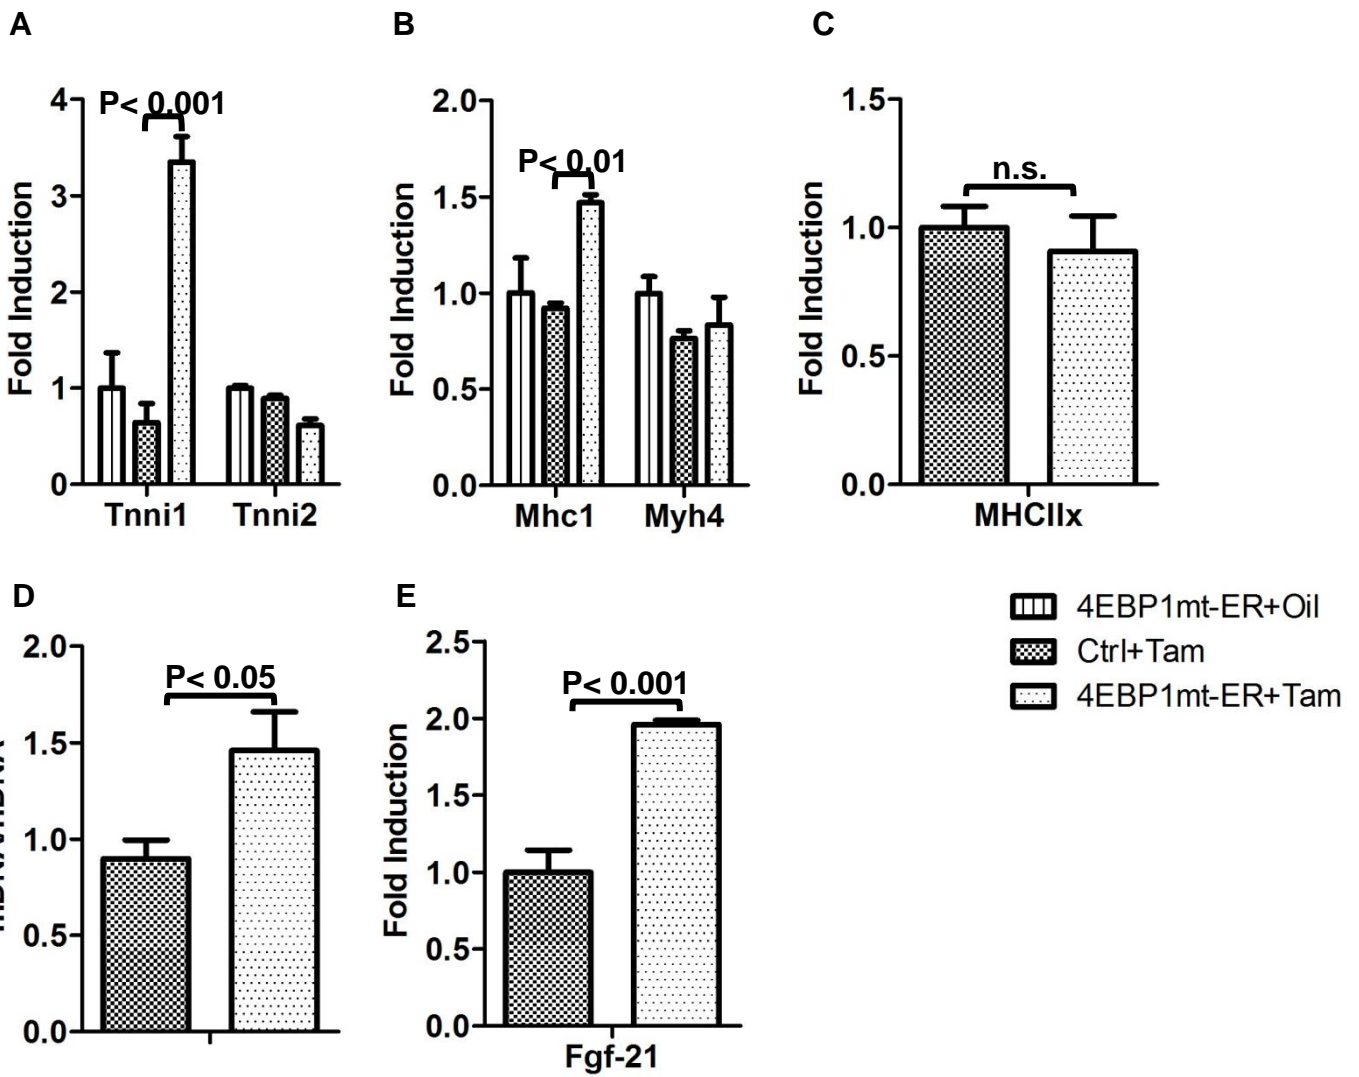

Supplement: JCI77361sd.pdf [file JCI77361sd.pdf]
